1 **Contribution of single mutations to selected SARS-CoV-2 emerging variants Spike**  
2 **antigenicity**

3 Shang Yu Gong<sup>1,2\*</sup>, Debashree Chatterjee<sup>1\*</sup>, Jonathan Richard<sup>1,3</sup>, Jérémie Prévost<sup>1,3</sup>, Alexandra  
4 Tauzin<sup>1,3</sup>, Romain Gasser<sup>1,3</sup>, Yuxia Bo<sup>4</sup>, Dani Vézina<sup>1,3</sup>, Guillaume Goyette<sup>1</sup>, Gabrielle Gendron-  
5 Lepage<sup>1</sup>, Halima Medjahed<sup>1</sup>, Michel Roger<sup>1,3,5</sup>, Marceline Côté<sup>4</sup>, and Andrés Finzi<sup>1,2,3</sup>

6  
7 <sup>1</sup>Centre de Recherche du CHUM, QC H2X 0A9, Canada

8 <sup>2</sup>Department of Microbiology and Immunology, McGill University, Montreal, QC H3A 0G4,  
9 Canada.

10 <sup>3</sup>Département de Microbiologie, Infectiologie et Immunologie, Université de Montréal, Montréal,  
11 QC H2X 0A9, Canada

12 <sup>4</sup> Department of Biochemistry, Microbiology and Immunology, and Center for Infection,  
13 Immunity, and Inflammation, University of Ottawa, Ottawa, ON K1H 8M5, Canada.

14 <sup>5</sup> Laboratoire de Santé Publique du Québec, Institut Nationale de Santé Publique du Québec,  
15 Sainte-Anne-de-Bellevue, QC H9X 3R5, Canada.

16

17

18 \*Contributed equally

19

20 # Corresponding author: Andrés Finzi [andres.finzi@umontreal.ca](mailto:andres.finzi@umontreal.ca)

21

22 **Key Words:** Coronavirus, COVID-19, SARS-CoV-2, Spike glycoproteins, RBD, ACE2,  
23 temperature, variants of concern, vaccines

24 **Word count for the abstract: 148**

25 **Character count for the text: 4079**

26

27

28

29 **ABSTRACT**

30 Towards the end of 2020, multiple variants of concern (VOCs) and variants of interest (VOIs)  
31 have arisen from the original SARS-CoV-2 Wuhan-Hu-1 strain. Mutations in the Spike protein are  
32 highly scrutinized for their impact on transmissibility, pathogenesis and vaccine efficacy. Here,  
33 we contribute to the growing body of literature on emerging variants by evaluating the impact of  
34 single mutations on the overall antigenicity of selected variants and their binding to the ACE2  
35 receptor. We observe a differential contribution of single mutants to the global variants phenotype  
36 related to ACE2 interaction and antigenicity. Using biolayer interferometry, we observe that  
37 enhanced ACE2 interaction is mostly modulated by a decrease in off-rate. Finally, we made the  
38 interesting observation that the Spikes from tested emerging variants bind better to ACE2 at 37°C  
39 compared to the D614G variant. Whether improved ACE2 binding at higher temperature facilitates  
40 emerging variants transmission remain to be demonstrated.

41

## 42 INTRODUCTION

43 Severe Acute Respiratory Syndrome Coronavirus 2 (SARS-CoV-2), the causative agent of  
44 COVID-19, remains an major public health concern, infecting over 185 million individuals and  
45 causing over 4 million deaths worldwide (Dong et al., 2020). The replication cycle of SARS-CoV-  
46 2 starts with viral attachment to the target cell and fusion between viral and cellular membranes.  
47 The viral entry process is mediated by the mature Spike (S) glycoprotein trimer which is composed  
48 of exterior S1 and transmembrane S2 subunits. The S1 subunit mediates attachment using its  
49 receptor-binding domain (RBD) to interact with the host protein angiotensin converting enzyme 2  
50 (ACE2) (Hoffmann et al., 2020; Shang et al., 2020; Walls et al., 2019), while the S2 subunit  
51 governs the fusion between the viral and cellular membranes (Walls et al., 2020; Wrapp et al.,  
52 2020). The Spike is a major target of the cellular and humoral responses elicited by natural infection.  
53 Accordingly, the antigen used in currently approved vaccines is the stabilized form of the SARS-  
54 CoV-2 S glycoprotein. These vaccines use adenoviral vectors (Sadoff et al., 2021a; Voysey et al.,  
55 2021) or mRNA vaccine platforms to express S glycoprotein (Baden et al., 2020; Polack et al.,  
56 2020). The S glycoprotein was selected due to its high immunogenicity and safety profiles after  
57 extensive research (Jackson et al., 2020; Krammer, 2020; Mulligan et al., 2020; Sadoff et al.,  
58 2021b).

59 Although the approval of several vaccine platforms has given us hope to end the pandemic,  
60 the asymmetric distribution of doses between rich and poor countries and the rapid emergence of  
61 SARS-CoV-2 variants is preoccupying. The Spike is under high selective pressure to evade host  
62 immune response, improve ACE2 affinity, escape antibody recognition and achieve high  
63 transmissibility (Prévost and Finzi, 2021). The first identified D614G mutation in the Spike  
64 glycoprotein became dominant among the rapidly spreading emerging variants (Korber et al., 2020;  
65 Plante et al., 2021). In late 2020, several other variants emerged throughout the world, including

66 the variants of concern (VOCs) B.1.1.7 (Alpha), B.1.351 (Beta), P.1 (Gamma) and B.1.617.2  
67 (Delta), as well as the variants of interest (VOIs) B.1.429 (Epsilon), B.1.526 (Iota), B.1.617.1  
68 (Kappa) and B.1.617 (CDC; Deng et al., 2021; ECDC, 2020, 2021; Ferreira et al., 2021; Mwenda  
69 M, 2021; West et al., 2021). Critical mutations providing a fitness increase became rapidly selected  
70 in most emerging variants. For example, the N501Y substitution that was first observed in the  
71 B.1.1.7 lineage and provides enhanced ACE2 binding (Prévost et al., 2021; Starr et al., 2020; Zhu  
72 et al., 2021), is now present in B.1.351, P.1, and P.3 lineages. Similarly, the E484K and K417N/T  
73 mutations in the RBD that were first described in the B.1.351 and P.1 lineages likely due to  
74 immune evasion from vaccine or natural infection-elicited antibodies (Amanat et al., 2021; Wang  
75 et al., 2021), are now present in several other lineages (Rambaut et al., 2020). Hence, it is important  
76 to closely monitor not only the emerging variants but also single mutations to better understand  
77 their contribution to replicative fitness and/or ability to evade natural or vaccine-induced immunity.

78 Here, by performing detailed binding and neutralization experiments with plasma from  
79 naturally infected and vaccinated individuals, we provide a comprehensive analysis of the  
80 antigenicity of the Spike from selected VOCs (B.1.1.7, B.1.351, P.1 and B.1.617.2) and VOIs  
81 (B.1.429, B.1.526, B.1.617, B.1.617.1).

82

83

84

85

86

87

88

## 89 **MATERIALS AND METHODS**

90

### 91 **Ethics Statement**

92 All work was conducted in accordance with the Declaration of Helsinki in terms of informed  
93 consent and approval by an appropriate institutional board. Blood samples were obtained from  
94 donors who consented to participate in this research project at CHUM (19.381). Plasmas were  
95 isolated by centrifugation.

96

### 97 **Plasmas and antibodies**

98 Plasmas of SARS-CoV-2 naïve-vaccinated and previously infected pre- and post-first dose  
99 vaccination donors were collected, heat-inactivated for 1 hour at 56°C and stored at -80°C until  
100 use in subsequent experiments. Plasma from uninfected donors collected before the pandemic were  
101 used as negative controls in our flow cytometry and neutralization assays (not shown). The S2-  
102 specific monoclonal antibody CV3-25 was used as a positive control and to normalized Spike  
103 expression in our flow cytometry assays and was previously described (Jennewein et al., 2021;  
104 Mothes et al., 2021; Tauzin et al., 2021; Ullah et al., 2021). ACE2 binding was measured using  
105 the recombinant ACE2-Fc protein, which is composed of two ACE2 ectodomains linked to the Fc  
106 portion of the human IgG (Anand et al., 2020). Alexa Fluor-647-conjugated goat anti-human Abs  
107 (Invitrogen) were used as secondary antibodies to detect ACE2-Fc and plasma binding in flow  
108 cytometry experiments.

109

### 110 **Cell lines**

111 293T human embryonic kidney cells (obtained from ATCC) were maintained at 37°C under 5%  
112 CO<sub>2</sub> in Dulbecco's modified Eagle's medium (DMEM) (Wisent) containing 5% fetal bovine serum

113 (VWR) and 100 µg/ml of penicillin-streptomycin (Wisent). The 293T-ACE2 cell line was  
114 previously described (Prévost et al., 2020) and was maintained in medium supplemented with 2  
115 µg/mL of puromycin (Millipore Sigma).

116

## 117 **Plasmids**

118 The plasmid encoding B.1.1.7, B.1.351, P.1, and B.1.526 Spikes were codon-optimized and  
119 synthesized by Genscript. Plasmids encoding B.1.617, B.1.617.1, B.1.617.2 Spikes were generated  
120 by overlapping PCR using a codon-optimized wild-type SARS-CoV-2 Spike gene (GeneArt,  
121 ThermoFisher) that was synthesized (Biobasic) and cloned in pCAGGS as a template. Plasmids  
122 encoding B.1.429, D614G and other SARS-CoV-2 Spike single mutations were generated using  
123 the QuickChange II XL site-directed mutagenesis protocol (Stratagene) and the pCG1-SARS-  
124 CoV-2-S plasmid kindly provided by Stefan Pöhlmann. The presence of the desired mutations was  
125 determined by automated DNA sequencing.

126

## 127 **Protein expression and purification**

128 FreeStyle 293F cells (Invitrogen) were grown in FreeStyle 293F medium (Invitrogen) to a density  
129 of  $1 \times 10^6$  cells/mL at 37°C with 8 % CO<sub>2</sub> with regular agitation (150 rpm). Cells were transfected  
130 with a plasmid coding for SARS-CoV-2 S RBD using ExpiFectamine 293 transfection reagent, as  
131 directed by the manufacturer (Invitrogen). One week later, cells were pelleted and discarded.  
132 Supernatants were filtered using a 0.22 µm filter (Thermo Fisher Scientific). The recombinant  
133 RBD proteins were purified by nickel affinity columns, as directed by the manufacturer  
134 (Invitrogen). The RBD preparations were dialyzed against phosphate-buffered saline (PBS) and

135 stored in aliquots at -80°C until further use. To assess purity, recombinant proteins were loaded on  
136 SDS-PAGE gels and stained with Coomassie Blue.

137

### 138 **Virus neutralization assay**

139 293T cells were transfected with the lentiviral vector pNL4.3 R-E- Luc (NIH AIDS Reagent  
140 Program) and a plasmid encoding for the indicated Spike glycoprotein (D614G, B.1.1.7, P.1,  
141 B.1.351, B.1.429, B.1.526, B.1.617, B.1.617.1, B.1.617.2) at a ratio of 10:1. Two days post-  
142 transfection, cell supernatants were harvested and stored at -80°C until use. 293T-ACE2 target  
143 cells were seeded at a density of  $1 \times 10^4$  cells/well in 96-well luminometer-compatible tissue culture  
144 plates (Perkin Elmer) 24h before infection. Pseudoviral particles were incubated with the indicated  
145 plasma dilutions (1/50; 1/250; 1/1250; 1/6250; 1/31250) for 1h at 37°C and were then added to the  
146 target cells followed by incubation for 48h at 37°C. Then, cells were lysed by the addition of 30  
147  $\mu$ L of passive lysis buffer (Promega) followed by one freeze-thaw cycle. An LB942 TriStar  
148 luminometer (Berthold Technologies) was used to measure the luciferase activity of each well  
149 after the addition of 100  $\mu$ L of luciferin buffer (15mM MgSO<sub>4</sub>, 15mM KPO<sub>4</sub> [pH 7.8], 1mM ATP,  
150 and 1mM dithiothreitol) and 50  $\mu$ L of 1mM d-luciferin potassium salt (Prolume). The  
151 neutralization half-maximal inhibitory dilution (ID<sub>50</sub>) represents the plasma dilution to inhibit 50%  
152 of the infection of 293T-ACE2 cells by SARS-CoV-2 pseudoviruses.

153

### 154 **Cell surface staining and flow cytometry analysis**

155 293T were transfected with full length SARS-CoV-2 Spikes and a green fluorescent protein (GFP)  
156 expressor (pIRES2-eGFP; Clontech) using the calcium-phosphate method. Two days post-  
157 transfection, 293T-Spike cells were stained with the CV3-25 Ab, ACE2-Fc or plasma from SARS-

158 CoV-2-naïve or recovered donors. Briefly, 5  $\mu\text{g}/\text{mL}$  CV3-25 or 20  $\mu\text{g}/\text{mL}$  ACE2-Fc were  
159 incubated with cells at 37°C or 4 °C for 45 min. Plasma from SARS-CoV-2 naïve or convalescent  
160 donors were incubated with cells at 37°C. The percentage of Spike-expressing cells (GFP+ cells)  
161 was determined by gating the living cell population based on viability dye staining (Aqua Vivid,  
162 Invitrogen). Samples were acquired on a LSRII cytometer (BD Biosciences), and data analysis  
163 was performed using FlowJo v10.7.1 (Tree Star). The conformational-independent S2-targeting  
164 mAb CV3-25 was used to normalize Spike expression. CV3-25 was shown to be effective against  
165 all Spike variants (Mothes et al., 2021). The Median Fluorescence intensities (MFI) obtained with  
166 ACE2-Fc or plasma Abs were normalized to the MFI obtained with CV3-25 and presented as ratio  
167 of the CV3-25-normalized values obtained with the D614G Spike.

168

### 169 **Bi-layer Interferometry**

170 Binding kinetics were performed on an Octet RED96e system (FortéBio) at 25°C with shaking at  
171 1,000 RPM. Amine Reactive Second-Generation (AR2G) biosensors were hydrated in water, then  
172 activated for 300 s with an S-NHS/EDC solution (Fortébio) prior to amine coupling. SARS-CoV-  
173 2 RBD proteins were loaded into AR2G biosensor at 12.5  $\mu\text{g}/\text{mL}$  in 10mM acetate solution pH5  
174 (Fortébio) for 600 s and then quenched into 1M ethanolamine solution pH8.5 (Fortébio) for 300 s.  
175 Baseline equilibration was collected for 120 s in 10X kinetics buffer. Association of sACE2 (in  
176 10X kinetics buffer) to the different RBD proteins was carried out for 180 s at various  
177 concentrations in a two-fold dilution series from 500nM to 31.25nM prior to dissociation for 300  
178 s. The data were baseline subtracted prior to fitting performed using a 1:1 binding model and the  
179 FortéBio data analysis software. Calculation of on-rates ( $K_a$ ), off-rates ( $K_{dis}$ ), and affinity constants  
180 ( $K_D$ ) was computed using a global fit applied to all data.



181 **RESULTS**

182

183 **ACE2 recognition by SARS-CoV-2 single mutants and full Spike variants**

184         Since the SARS-CoV-2 Spike is under strong selective pressure and is responsible for  
185 interacting with the ACE2 receptor, we measured the ability of the Spike from emerging variants  
186 to interact with ACE2 and the contribution of each single mutations toward this binding. Plasmids  
187 expressing the SARS-CoV-2 full Spike harboring single or combined mutations from emerging  
188 variants were transfected into HEK 293T cells. Spike expression was normalized with the  
189 conformationally independent, S2-specific CV3-25 monoclonal antibody (mAb) (Mothes et al.,  
190 2021; Ullah et al., 2021). ACE2 binding was measured using the recombinant ACE2-Fc protein,  
191 which is composed of two ACE2 ectodomains linked to the Fc portion of the human IgG (Anand  
192 et al., 2020). Alexa Fluor 647-conjugated secondary Ab was then used to detect ACE2-Fc binding  
193 to cell-surface Spike by flow cytometry. At the time of writing, B.1.617.1 and B.1.617.2 came into  
194 importance and only the full Spikes from these variants were synthesized, not the single mutations.  
195 When compared to the D614G Spike, all tested Spike variants, with the exception of B.1.617.1,  
196 presented significantly higher ACE2 binding (Fig 1A).

197         We then determine the contribution of individual Spike mutations on ACE2 binding to  
198 discern the ones contributing to the heightened receptor affinity of emerging variants. The B.1.1.7  
199 Spike presented the highest ACE2-Fc interaction amongst all tested Spikes, which is a 5.43-fold  
200 increase in ACE2-Fc binding compared to D614G (Fig 1A-B and Table S2). The mutations that  
201 likely contribute to this phenotype are  $\Delta$ H69-V70 in the N terminal domain (NTD) and N501Y in  
202 the RBD that enhanced binding by  $\sim$ 1.51 and  $\sim$ 2.52 folds, respectively (Fig 1B).

203         The Spike from B.1.351 also presented significantly higher ACE2-Fc binding compared to  
204 D614G. Similarly to B.1.1.7, the N501Y mutation likely plays an important role in this phenotype

205 (Fig. 1C). Interestingly, three mutations/deletion in this VOC decreased the interaction with  
206 ACE2-Fc, namely R246I and  $\Delta$ 242-244 in the NTD, as well as K417N in the RBD. The NTD  
207 substitution R246I decreased ACE2-Fc binding by  $\sim$ 1.52 folds, the  $\Delta$ 242-244 deletion by  $\sim$ 1.35  
208 folds, whereas K417N had a greater impact with a decreased binding of  $\sim$ 7.7 folds relative to  
209 D614G (Fig 1C). Of note, the E484K mutation, also found in the RBD of other emerging variants  
210 (P.1 and B.1.526) did not significantly impact the ACE2-Fc interaction.

211 The Spike from P.1 presented a  $\sim$ 4.24-fold increase in binding compared to D614G (Fig  
212 1D). Few NTD mutations, namely T20N, P26S, D138Y, and R190S, likely contributed to the  
213 increase in ACE2 binding, with  $\sim$ 2,  $\sim$ 1.6,  $\sim$ 1.3 and  $\sim$ 1.8- fold increase compared to D614G,  
214 respectively. Like the above-mentioned VOCs, N501Y also likely played a role in enhanced  
215 ACE2-Fc interaction. Interestingly, the RBD mutation K417T and the S2 mutation T1027I  
216 decreased the ACE2-Fc by  $\sim$ 1.3 and  $\sim$ 1.7 folds respectively. The H655Y mutation, near the S1/S2  
217 cleavage site, also slightly increased ACE2 interaction by  $\sim$ 1.2 folds (Fig 1D).

218 The Spike from B.1.429 augmented ACE2-Fc interaction by  $\sim$ 2.8 folds (Fig 1E). This VOI  
219 has two NTD mutations, S13I and W152C, both of which did not significantly impact this  
220 interaction. On the other hand, its RBD mutation, L452R, increased ACE2-Fc binding by  $\sim$ 2.7  
221 folds, suggesting its major contribution to the phenotype of this variant (Fig 1E).

222 Lastly, the Spike from B.1.526 showed a  $\sim$ 1.8-fold increase over D614G (Fig 1F). None  
223 of the mutation appears to explain the phenotype observed with the full variant.

224 While our results identified some key mutations enhancing ACE2 interaction (i.e.,  
225 N501Y,L452R and mutation/deletion in the NTD), the overall increased ACE2 affinity from any  
226 given variant appears to result from more than the sum of the effect of individual mutations  
227 composing this variant.

228

## 229 **Impact of selected mutations on the affinity of Spike RBD for ACE2**

230         Next, we used biolayer interferometry (BLI) to measure the binding kinetics of selected  
231 RBD mutants to soluble ACE2 (sACE2). Biosensors were coated with recombinant RBD and put  
232 in contact with increasing concentration of sACE2 (Fig 2). In agreement with previous reports  
233 (Prévost et al., 2021; Zhu et al., 2021), the N501Y mutation present in B.1.1.7, B.1.351, and P.1  
234 significantly decreased the off-rate ( $K_{dis}$ ) (from  $6.88 \times 10^{-3}$  to  $1.49 \times 10^{-3}$  1/s), presenting a 3.88-fold  
235 increase in  $K_D$  compared to its wild-type counterpart (Fig 2A-B, Table S1). Substitution at position  
236 K417 (either N or T) present in B.1.351 or P.1 lineages accelerated the off-rate kinetics, resulting  
237 in a 0.75- and 0.66-fold decrease in binding affinity (Fig 2C-D, Table S1). Although both K417N  
238 and K417T presented a modest increase in the on-rate kinetic by  $\sim 1.56$  and  $\sim 1.11$  folds, the  
239 accelerated off-rate kinetics dictated the overall decrease affinity of these mutants. No major  
240 changes were observed for the E484K mutation (Fig 2F). Interestingly, the L452R mutant did not  
241 have a major impact in ACE2 affinity when tested in the context of recombinant monomeric RBD  
242 (Fig. 2G) but presented enhanced binding within the context of full-length membrane anchored  
243 Spike (Fig. 1E), indicating that the overall phenotype of a mutant (in this case enhanced binding)  
244 cannot always be recapitulated with the RBD alone. Altogether, our results show that at least for  
245 the RBD mutants tested here, ACE2 affinity is mostly dictated by the dissociation kinetics.

246

## 247 **Effect of temperature on full variants Spike recognition of ACE2**

248         It was recently shown that the affinity of Spike for ACE2 increases at low temperatures  
249 (Prévost et al., 2021). Interestingly, Prévost *et al.* also showed that the Spike from B.1.1.7 or  
250 harboring the N501Y mutation present better ACE2 binding at higher temperatures compared to

251 the D614G strain (Prévost et al., 2021). To evaluate whether the Spikes from the emerging variants  
252 tested here also shared this phenotype, Spike-expressing cells were incubated at either 4°C or 37°C,  
253 and their ACE2-Fc binding was measured by flow cytometry. As presented in Fig. 3, the binding  
254 of ACE2-Fc to cell surface Spike was higher at cold temperature (4°C) compared to warm  
255 temperature (37°C) for all the variants. The impact of cold temperature on ACE2 binding was,  
256 however, more pronounced for the D614G Spike (3.62-fold increase) comparatively to Spikes  
257 from emerging variants (1.57 to 3.08-fold increase). While ACE2 displayed higher binding for the  
258 different emerging variants Spikes at 37°C, similar level of binding could only be achieved for the  
259 D614G Spike when decreasing the temperature to 4°C. This suggests that Spikes from emerging  
260 variants are able to bypass the temperature restraint to achieve high ACE2 binding. Interestingly,  
261 variants harboring the N501Y mutation (B.1.1.7, B.1.351 and P.1) exhibited an increase in ACE2  
262 binding compared to D614G Spike at both 4°C and 37°C, while this phenotype was only observed  
263 at 37°C with Spike from the other variants. This indicate that the cold temperature and the N501Y  
264 mutation significantly impact Spike-ACE2 interaction.

265

### 266 **Recognition of Spike variants by plasma from vaccinated individuals**

267 To gain information related to the antigenic profile of each emerging variants Spike and  
268 their single mutants, we used plasma collected three weeks post BNT162b2 vaccination from  
269 SARS-CoV-2 naïve (Fig. 4) or previously-infected individuals (Fig. 5) (Tauzin et al., 2021). HEK  
270 293T cells were transfected with Spike from emerging variants or their individual mutants and  
271 plasma binding was evaluated by flow cytometry, as previously reported (Anand et al., 2021;  
272 Beaudoin-Bussièrès et al., 2020; Gasser et al., 2021; Prévost et al., 2020; Tauzin et al., 2021).  
273 When compared to D614G, Spike from B.1.1.7, P.1 and the recently emerged B.1.617.1 and

274 B.1.617.2 variants were significantly less recognized by the plasma from SARS-CoV-2 naïve  
275 individuals (Fig 4A).

276 Mutations apparently contributing to the reduction of plasma recognition of the B.1.1.7  
277 Spike are the  $\Delta$ Y144 deletion in the NTD, P681H and T716I near the S1/S2 cleavage site (Fig 4B).  
278 The N501Y substitution, also present in other emerging variants (B1.351 and P.1), is the only  
279 mutation that increased plasma recognition.

280 While we did not observe a significant decrease in plasma recognition of the B.1.351 Spike,  
281 most single mutants of this VOC (L18F, D80A, D215G,  $\Delta$ 242-244, R246I in the NTD, and K417N  
282 in the RBD) exhibit decreased binding. Of note, the K417N mutation that reduced ACE2 binding  
283 (Fig 1C), also significantly impacted plasma recognition by  $\sim$ 1.75-fold compared to D614G (Fig  
284 4C).

285 Polyclonal recognition of the P.1 Spike was reduced by  $\sim$ 1.33 folds (Fig 4D). Our results  
286 show that all the NTD mutations, namely L18F, T20N, P26S, D138Y and R190S, attenuated the  
287 binding of naïve-vaccinated plasma Abs (Fig 4D). Furthermore, H655Y also contributed to the  
288 immuno-evasive phenotype of the full Spike (Fig 4D). Again, N501Y is the only mutation that  
289 increased plasma recognition, indicating its major role amongst all the mutations of this variant.

290  
291 Although the full B.1.429 Spike did not show a significant evasion of plasma recognition,  
292 all of its mutations presented a significant decrease in plasma binding (Fig 4E). Both its NTD  
293 mutations, S13I and W152C, were less efficiently recognized by plasma compared to D614G (Fig  
294 4E). The RBD mutation L452R also presented a minor  $\sim$ 1.16-fold decrease in recognition by  
295 plasma from vaccinated individuals. Lastly, the B.1.526 full Spike variant did not significantly  
296 affect vaccine-elicited plasma recognition. The same phenotype is applicable to most of its

297 mutations, with the exception of D253G substitution in the NTD, which showed a modest ~1.2-  
298 fold decrease in binding (Fig 4F).

299 We then evaluated the recognition of our panel of Spikes (VOC, VOI and single mutants)  
300 by plasma from previously-infected vaccinated individuals (plasma recovered three weeks post  
301 vaccination), as recently described (Tauzin et al., 2021). When comparing all Spikes from  
302 emerging variants, the convalescent plasma pre- and post-first dose vaccination both effectively  
303 recognized all tested Spikes (Fig 5A, S1 and S2). Vaccinated convalescent individuals developed  
304 Abs that were able to robustly recognize and bind to the emerging variants B.1.1.7, B.1.351,  
305 B.1.429 and B.1.526 at a similar level than D614G. Binding was decreased by ~ 1.14 folds for P.1,  
306 ~1.3 folds for B.1.617 and by ~ 1.8 and ~1.64 folds for B.1.617.1 and B.1.617.2 Spikes,  
307 respectively (Fig 5A).

308 Examining each variant and their single mutations more closely, though full B.1.1.7 Spike  
309 did not significantly reduce plasma binding in convalescent post-vaccinated individuals, three of  
310 its single mutations,  $\Delta$ Y144, P681H, and S982A significantly affected plasma recognition.  
311 Substitution S982A in the S2 showed the most important reduction, by ~2 folds compared to  
312 D614G (Fig 5B). Inversely, the deletion  $\Delta$ H69-V70 and the substitution D1118H slightly enhanced  
313 the recognition of this Spike by plasma from previously-infected vaccinated individuals. However,  
314 combined together, the B.1.1.7 was recognized similarly to its D614G counterpart by these  
315 plasmas.

316 The B.1.351 Spike was efficiently recognized by plasma from previously-infected  
317 vaccinated individuals with a single mutation presenting lower detection (A701V) (Fig 5C). In the  
318 P.1 Spike we observed mutations in the NTD that decreased recognition (P26S, D138Y, and  
319 R190S) (Fig 5D). The Spikes from B.1.429 and B.1.526 were also efficiently recognized. Only the

320 A701V substitution present in the B.1.526 reduced plasma binding (Fig.5F). Among all tested  
321 emerging variants, the Spikes from B.1.617.1 and B.1.617.2 presented the most important decrease  
322 in recognition by ~1.8 and ~1.64 folds compared to D614G (Figure 5A)

323 Altogether, our results highlight the difficulty in predicting the phenotype of a particular  
324 variant based on the phenotype of its individual mutations.

325

### 326 **Neutralization of Spike variants by plasma from vaccinated individuals**

327 We then determined the neutralization profile of the different emerging variants Spikes  
328 using a pseudoviral neutralization assay (Anand et al., 2021; Beaudoin-Bussi eres et al., 2020; Ding  
329 et al., 2020; Gasser et al., 2021; Pr evost et al., 2020). For this assay we used plasma from five  
330 individuals previously infected with SARS-CoV-2 (on average 8 months post-symptom onset)  
331 after one dose of the Pfizer/BioNtech BNT162b2 vaccine (samples were collected 22 days after  
332 immunization) (Tauzin et al., 2021). As we described previously (Tauzin et al., 2021), we  
333 incubated serial dilutions of plasma with pseudoviruses bearing the different Spikes before adding  
334 to HEK 293T target cells stably expressing the human ACE2 receptor (Tauzin et al., 2021). We  
335 obtained robust neutralization for all pseudoviral particles, with a modest, but significant decrease  
336 in neutralization against pseudoviruses bearing the Spike from B.1.351, B.1.526 and B.1.617.2  
337 lineages, indicating that plasma from previously-infected individuals following a single dose have  
338 a relatively good neutralizing activity against emerging variants (Fig 6).

## 339 **DISCUSSION**

340 In our study, we offer a comparative view examining the ACE2 binding properties of  
341 selected circulating variants, and the impact of their single mutations on plasma binding. We  
342 observed that Spikes from B.1.1.7, B.1.351, P.1, B.1.429, B.1.526, B.1.617, and B.1.617.2 lineages  
343 present increased ACE2 interaction. Consistent with previous reports (Leung et al., 2021; Starr et  
344 al., 2020; Washington et al., 2021), the N501Y mutation shared by B.1.1.7, B.1.351, and P.1  
345 variants presented a significant increase for ACE2-Fc binding. While N501Y plays a major role in  
346 enhanced transmissibility and infectivity (Liu et al., 2021), variants which do not share this  
347 mutation have also gained the increased ACE2 binding by harboring other mutations, such as in  
348 the B.1.429 lineage, where the L452R showed higher ACE2 binding.

349 We also analyzed the impact of temperature in modulating the capacity of Spikes from  
350 emerging variants to interact with the viral receptor ACE2. For almost all tested Spikes, we  
351 observed a significant increase in ACE2 binding at cold temperature (4 °C). As recently reported,  
352 this could be explained by favorable thermodynamics changes allowing the stabilization of the  
353 RBD-ACE2 interface and by modulating the Spike trimer conformation (Prévost et al., 2021).  
354 While the D614G Spike necessitates lower temperature for optimal ACE2 interaction, Spikes from  
355 the different VOCs and VOIs seem to bypass this requirement to efficiently interact with ACE2 at  
356 higher temperature (37 °C). However, whether improved ACE2 binding at higher temperature  
357 facilitates emerging variants transmission and propagation remain to be demonstrated.  
358 Interestingly, variants harboring the N501Y mutation displayed improve ACE2 interaction  
359 compared to the D614G Spike, independently of the temperature, highlighting the critical impact  
360 of this substitution in improving Spike – ACE2 interaction. This reveals the importance of closely  
361 monitoring the appearance of this mutation among the current and future emerging variants. The  
362 appearance of this substitution could potentially impact the transmission and propagation of recent



363 rapidly spreading emerging variants (such as the B.1.617.2 lineage) that do not harbor this  
364 mutation, by enhancing the affinity of their Spike for the ACE2 receptor at cold and warm  
365 temperatures.

366 We also found that plasma from vaccinated SARS-CoV-2 naïve and prior-infected  
367 individuals efficiently recognized the Spikes from emerging variants. However, as previously  
368 shown, plasma from vaccinated previously-infected individuals presented a higher and more  
369 robust recognition of all tested Spikes (Fig. S2)(Lucas et al., 2021; Tauzin et al., 2021).  
370 Accordingly, plasma from these individuals were able to neutralize pseudoviral particles bearing  
371 the different emerging variants Spikes, further highlighting the resilience of the deployed vaccines,  
372 which were based on the original Wuhan strain.

373

## 374 **CONCLUSIONS**

375 Altogether, our results highlight the difficulty in predicting the phenotype of an emerging  
376 variant's Spike, either related to ACE2 interaction, antigenic profile, infectivity and transmission  
377 based on the sum of the phenotype of single mutants making that particular Spike. Antigenic drift  
378 has been and remains a concern of the current pandemic (Callaway, 2021; Prévost and Finzi, 2021)  
379 and therefore, closely monitoring the functional properties of emerging variants remains of the  
380 utmost importance for vaccine design and to inform public health authorities to better manage the  
381 epidemic by implementing preventive interventions to control the spread of highly transmissible  
382 virus, and tailoring vaccination campaign .

383

384

385 **CRedit authorship contribution statement**

386 **Shang Yu Gong:** Conceptualization, Methodology, Validation, Formal analysis, Investigation,  
387 Resources, Writing – original draft, Visualization. **Debashree Chatterjee:** Conceptualization,  
388 Methodology, Validation, Formal analysis, Investigation, Resources, Writing – original draft,  
389 Visualization. **Jonathan Richard:** Conceptualization, Methodology, Validation, Formal analysis,  
390 Investigation, Writing – original draft, Supervision. **Jérémie Prévost:** Conceptualization,  
391 Methodology, Resources. **Alexandra Tauzin:** Methodology, Resources, Validation, Formal  
392 analysis, Investigation. **Romain Gasser:** Methodology, Resources, Validation, Formal analysis,  
393 Investigation. **Dani Vézina:** Resources. **Guillaume Goyette:** Resources. **Gabrielle Gendron-**  
394 **Lepage:** Resources. **Michel Roger:** Resources, Writing - Review & Editing. **Marceline Côté:**  
395 Methodology, Writing - Review & Editing, Supervision, Funding acquisition. **Andrés Finzi:**  
396 Conceptualization, Methodology, Writing – original draft, Writing – original draft, Visualization,  
397 Project administration, Supervision, Funding acquisition.

398 **Acknowledgements**

399 The authors thank the CRCHUM BSL 3 and Flow Cytometry Platforms for their technical  
400 assistance and Dr Sandrine Moreira (Laboratoire de Santé Publique du Québec) for helpful  
401 discussions. We thank Dr. Stefan Pöhlmann and Dr. Markus Hoffmann (Georg-August University)  
402 for the plasmids coding for SARS-CoV-2 WT Spike (Wuhan-Hu-1 strain) and Dr Jason McLellan  
403 for the plasmid coding for sACE2 expressor. The CV3-25 antibody was produced using the pTT  
404 vector kindly provided by the Canada Research Council.

405

406

407 **Funding**

408 This work was supported by le Ministère de l'Économie et de l'Innovation (MEI) du Québec,  
409 Programme de soutien aux organismes de recherche et d'innovation to A.F., the Fondation du  
410 CHUM, a CIHR foundation grant #352417, an Exceptional Fund COVID-19 from the Canada  
411 Foundation for Innovation (CFI) #41027, the Sentinelle COVID Quebec network led by the  
412 Laboratoire de Santé Publique du Québec (LSPQ) in collaboration with Fonds de Recherche du  
413 Québec-Santé (FRQS) and Genome Canada – Génome Québec, and by the Ministère de la Santé  
414 et des Services Sociaux (MSSS) and MEI. Funding was also provided by a CIHR operating grant  
415 Pandemic and Health Emergencies Research/Projet #465175 to A.F. and a CIHR stream 1 and 2  
416 for SARS-CoV-2 Variant Research to A.F. and M.C. M.C. and A.F. are recipients of Tier II Canada  
417 Research Chair in Molecular Virology and Antiviral Therapeutics (950-232840), and Retroviral  
418 Entry no. RCHS0235 950-232424 respectively. J.P. is supported by a CIHR fellowship. R.G. is  
419 supported by a MITACS Accélération postdoctoral fellowship. The funders had no role in study  
420 design, data collection and analysis, decision to publish, or preparation of the manuscript.

421 **Declaration of competing interest**

422  
423 The authors declare that they have no known competing financial interests or personal  
424 relationships that could have appeared to influence the work reported in this paper.

425

426

427 **REFERENCES**

- 428 Amanat, F., Thapa, M., Lei, T., Ahmed, S.M.S., Adelsberg, D.C., Carreño, J.M., Strohmeier, S., Schmitz,  
429 A.J., Zafar, S., Zhou, J.Q., Rijnink, W., Alshamary, H., Borchering, N., Reiche, A.G., Srivastava, K.,  
430 Sordillo, E.M., van Bakel, H., Personalized Virology, I., Turner, J.S., Bajic, G., Simon, V., Ellebedy,  
431 A.H., Krammer, F., 2021. SARS-CoV-2 mRNA vaccination induces functionally diverse antibodies to  
432 NTD, RBD, and S2. *Cell*.
- 433 Anand, S.P., Chen, Y., Prévost, J., Gasser, R., Beaudoin-Bussièrès, G., Abrams, C.F., Pazgier, M., Finzi,  
434 A., 2020. Interaction of Human ACE2 to Membrane-Bound SARS-CoV-1 and SARS-CoV-2 S  
435 Glycoproteins. *Viruses* 12.
- 436 Anand, S.P., Prévost, J., Nayrac, M., Beaudoin-Bussièrès, G., Benlarbi, M., Gasser, R., Brassard, N.,  
437 Laumaea, A., Gong, S.Y., Bourassa, C., Brunet-Ratnasingham, E., Medjahed, H., Gendron-Lepage, G.,  
438 Goyette, G., Gokool, L., Morrissette, C., Bégin, P., Martel-Laferrrière, V., Tremblay, C., Richard, J.,  
439 Bazin, R., Duerr, R., Kaufmann, D.E., Finzi, A., 2021. Longitudinal analysis of humoral immunity  
440 against SARS-CoV-2 Spike in convalescent individuals up to 8 months post-symptom onset. *Cell Rep*  
441 *Med* 2, 100290.
- 442 Baden, L.R., El Sahly, H.M., Essink, B., Kotloff, K., Frey, S., Novak, R., Diemert, D., Spector, S.A.,  
443 Roupheal, N., Creech, C.B., McGettigan, J., Khetan, S., Segall, N., Solis, J., Brosz, A., Fierro, C.,  
444 Schwartz, H., Neuzil, K., Corey, L., Gilbert, P., Janes, H., Follmann, D., Marovich, M., Mascola, J.,  
445 Polakowski, L., Ledgerwood, J., Graham, B.S., Bennett, H., Pajon, R., Knightly, C., Leav, B., Deng, W.,  
446 Zhou, H., Han, S., Ivarsson, M., Miller, J., Zaks, T., 2020. Efficacy and Safety of the mRNA-1273 SARS-  
447 CoV-2 Vaccine. *New England Journal of Medicine* 384, 403-416.
- 448 Beaudoin-Bussièrès, G., Laumaea, A., Anand Sai, P., Prévost, J., Gasser, R., Goyette, G., Medjahed, H.,  
449 Perreault, J., Tremblay, T., Lewin, A., Gokool, L., Morrissette, C., Bégin, P., Tremblay, C., Martel-  
450 Laferrrière, V., Kaufmann Daniel, E., Richard, J., Bazin, R., Finzi, A., Ho David, D., Goff Stephen, P.,  
451 2020. Decline of Humoral Responses against SARS-CoV-2 Spike in Convalescent Individuals. *mBio* 11,  
452 e02590-02520.
- 453 Callaway, E., 2021. Fast-spreading COVID variant can elude immune responses. *Nature* 589, 500-501.
- 454 CDC, SARS-CoV-2 Variant Classifications and Definitions.
- 455 Deng, X., Garcia-Knight, M.A., Khalid, M.M., Servellita, V., Wang, C., Morris, M.K., Sotomayor-  
456 González, A., Glasner, D.R., Reyes, K.R., Gliwa, A.S., Reddy, N.P., Sanchez San Martin, C., Federman,  
457 S., Cheng, J., Balcerek, J., Taylor, J., Streithorst, J.A., Miller, S., Sreekumar, B., Chen, P.Y., Schulze-  
458 Gahmen, U., Taha, T.Y., Hayashi, J.M., Simoneau, C.R., Kumar, G.R., McMahon, S., Lidsky, P.V., Xiao,  
459 Y., Hemarajata, P., Green, N.M., Espinosa, A., Kath, C., Haw, M., Bell, J., Hacker, J.K., Hanson, C.,  
460 Wadford, D.A., Anaya, C., Ferguson, D., Frankino, P.A., Shivram, H., Lareau, L.F., Wyman, S.K., Ott,  
461 M., Andino, R., Chiu, C.Y., 2021. Transmission, infectivity, and neutralization of a spike L452R SARS-  
462 CoV-2 variant. *Cell*.

- 463 Ding, S., Laumaea, A., Benlarbi, M., Beaudoin-Bussi eres, G., Gasser, R., Medjahed, H., Pancera, M.,  
464 Stamatatos, L., McGuire, A.T., Bazin, R., Finzi, A., 2020. Antibody Binding to SARS-CoV-2 S  
465 Glycoprotein Correlates with but Does Not Predict Neutralization. *Viruses* 12.
- 466 Dong, E., Du, H., Gardner, L., 2020. An interactive web-based dashboard to track COVID-19 in real  
467 time. *The Lancet Infectious Diseases* 20, 533-534.
- 468 ECDC, 2020. Rapid increase of a SARS-CoV-2 variant with multiple spike protein mutations observed in  
469 the United Kingdom, Threat Assessment Brief.
- 470 ECDC, 2021. Emergence of SARS-CoV-2 B.1.617 variants in India and situation in the EU/EEA, Threat  
471 Assessment Brief.
- 472 Ferreira, I., Datir, R., Kemp, S., Papa, G., Rakshit, P., Singh, S., Meng, B., Pandey, R., Ponnusamy, K.,  
473 Radhakrishnan, V.S., Sato, K., James, L., Agrawal, A., Gupta, R.K., 2021. SARS-CoV-2 B.1.617  
474 emergence and sensitivity to vaccine-elicited antibodies. *bioRxiv*, 2021.2005.2008.443253.
- 475 Gasser, R., Cloutier, M., Pr evost, J., Fink, C., Ducas,  .E., Ding, S., Dussault, N., Landry, P., Tremblay, T.,  
476 Laforce-Lavoie, A., Lewin, A., Beaudoin-Bussi eres, G., Laumaea, A., Medjahed, H., Larochelle, C.,  
477 Richard, J., Dekaban, G.A., Dikeakos, J.D., Bazin, R., Finzi, A., 2021. Major role of IgM in the  
478 neutralizing activity of convalescent plasma against SARS-CoV-2. *Cell Rep* 34, 108790.
- 479 Hoffmann, M., Kleine-Weber, H., Schroeder, S., Kr uger, N., Herrler, T., Erichsen, S., Schiergens, T.S.,  
480 Herrler, G., Wu, N.H., Nitsche, A., M uller, M.A., Drosten, C., P ohlmann, S., 2020. SARS-CoV-2 Cell  
481 Entry Depends on ACE2 and TMPRSS2 and Is Blocked by a Clinically Proven Protease Inhibitor. *Cell*  
482 181, 271-280.e278.
- 483 Jackson, L.A., Anderson, E.J., Roupheal, N.G., Roberts, P.C., Makhene, M., Coler, R.N., McCullough,  
484 M.P., Chappell, J.D., Denison, M.R., Stevens, L.J., Pruijssers, A.J., McDermott, A., Flach, B., Doria-  
485 Rose, N.A., Corbett, K.S., Morabito, K.M., O'Dell, S., Schmidt, S.D., Swanson, P.A., Padilla, M.,  
486 Mascola, J.R., Neuzil, K.M., Bennett, H., Sun, W., Peters, E., Makowski, M., Albert, J., Cross, K.,  
487 Buchanan, W., Pikaart-Tautges, R., Ledgerwood, J.E., Graham, B.S., Beigel, J.H., 2020. An mRNA  
488 Vaccine against SARS-CoV-2 — Preliminary Report. *New England Journal of Medicine* 383, 1920-1931.
- 489 Jennewein, M.F., MacCamy, A.J., Akins, N.R., Feng, J., Homad, L.J., Hurlburt, N.K., Seydoux, E., Wan,  
490 Y.-H., Stuart, A.B., Edara, V.V., Floyd, K., Vanderheiden, A., Mascola, J.R., Doria-Rose, N., Wang, L.,  
491 Yang, E.S., Chu, H.Y., Torres, J.L., Ozorowski, G., Ward, A.B., Whaley, R.E., Cohen, K.W., Pancera,  
492 M., McElrath, M.J., Englund, J.A., Finzi, A., Suthar, M.S., McGuire, A.T., Stamatatos, L., 2021. Isolation  
493 and characterization of cross-neutralizing coronavirus antibodies from COVID-19+ subjects. *Cell Reports*  
494 36, 109353.
- 495 Korber, B., Fischer, W.M., Gnanakaran, S., Yoon, H., Theiler, J., Abfalterer, W., Hengartner, N., Giorgi,  
496 E.E., Bhattacharya, T., Foley, B., Hastie, K.M., Parker, M.D., Partridge, D.G., Evans, C.M., Freeman,  
497 T.M., de Silva, T.I., McDanal, C., Perez, L.G., Tang, H., Moon-Walker, A., Whelan, S.P., LaBranche,  
498 C.C., Saphire, E.O., Montefiori, D.C., 2020. Tracking Changes in SARS-CoV-2 Spike: Evidence that  
499 D614G Increases Infectivity of the COVID-19 Virus. *Cell* 182, 812-827.e819.

- 500 Krammer, F., 2020. SARS-CoV-2 vaccines in development. *Nature* 586, 516-527.
- 501 Leung, K., Shum, M.H., Leung, G.M., Lam, T.T., Wu, J.T., 2021. Early transmissibility assessment of the  
502 N501Y mutant strains of SARS-CoV-2 in the United Kingdom, October to November 2020.  
503 *Eurosurveillance* 26, 2002106.
- 504 Liu, Y., Liu, J., Plante, K.S., Plante, J.A., Xie, X., Zhang, X., Ku, Z., An, Z., Scharton, D., Schindewolf,  
505 C., Menachery, V.D., Shi, P.-Y., Weaver, S.C., 2021. The N501Y spike substitution enhances SARS-  
506 CoV-2 transmission. *bioRxiv* : the preprint server for biology, 2021.2003.2008.434499.
- 507 Lucas, C., Vogels, C.B.F., Yildirim, I., Rothman, J., Lu, P., Monteiro, V., Gelhausen, J.R., Campbell, M.,  
508 Silva, J., Tabachikova, A., Munker, M.C., Breban, M.I., Fauver, J.R., Mohanty, S., Huang, J., Yale, S.-C.-  
509 G.S.I., Shaw, A.C., Ko, A., Omer, S.B., Grubaugh, N.D., Iwasaki, A., 2021. Impact of circulating SARS-  
510 CoV-2 variants on mRNA vaccine-induced immunity in uninfected and previously infected individuals.  
511 *medRxiv*, 2021.2007.2014.21260307.
- 512 Mothes, W., Li, W., Chen, Y., Prevost, J., Ullah, I., Lu, M., Gong, S.Y., Tazuin, A., Gasser, R., Vezina,  
513 D., Anand, S.P., Goyette, G., Chatterjee, D., Ding, S., Tolbert, W.D., Grunst, M.W., Bo, Y., Zhang, S.,  
514 Richard, J., Zhou, F., Huang, R.K., Esser, L., Zeher, A., Cote, M., Kumar, P., Sodroski, J., Xia, D., Uchil,  
515 P.D., Pazgier, M., Finzi, A., 2021. Structural Basis and Mode of Action for Two Broadly Neutralizing  
516 Antibodies Against SARS-CoV-2 Emerging Variants of Concern. *bioRxiv*, 2021.2008.2002.454546.
- 517 Mulligan, M.J., Lyke, K.E., Kitchin, N., Absalon, J., Gurtman, A., Lockhart, S., Neuzil, K., Raabe, V.,  
518 Bailey, R., Swanson, K.A., Li, P., Koury, K., Kalina, W., Cooper, D., Fontes-Garfias, C., Shi, P.Y.,  
519 Türeci, Ö., Tompkins, K.R., Walsh, E.E., Frenck, R., Falsey, A.R., Dormitzer, P.R., Gruber, W.C., Şahin,  
520 U., Jansen, K.U., 2020. Phase I/II study of COVID-19 RNA vaccine BNT162b1 in adults. *Nature* 586,  
521 589-593.
- 522 Mwenda M, S.N., Sinyange N, et al., 2021. Detection of B.1.351 SARS-CoV-2 Variant Strain - Zambia,  
523 December 2020, *Morbidity and Mortality Weekly Report (MMWR)*. CDC.
- 524 Plante, J.A., Liu, Y., Liu, J., Xia, H., Johnson, B.A., Lokugamage, K.G., Zhang, X., Muruato, A.E., Zou,  
525 J., Fontes-Garfias, C.R., Mirchandani, D., Scharton, D., Bilello, J.P., Ku, Z., An, Z., Kalveram, B.,  
526 Freiberg, A.N., Menachery, V.D., Xie, X., Plante, K.S., Weaver, S.C., Shi, P.-Y., 2021. Spike mutation  
527 D614G alters SARS-CoV-2 fitness. *Nature* 592, 116-121.
- 528 Polack, F.P., Thomas, S.J., Kitchin, N., Absalon, J., Gurtman, A., Lockhart, S., Perez, J.L., Pérez Marc,  
529 G., Moreira, E.D., Zerbini, C., Bailey, R., Swanson, K.A., Roychoudhury, S., Koury, K., Li, P., Kalina,  
530 W.V., Cooper, D., Frenck, R.W., Hammitt, L.L., Türeci, Ö., Nell, H., Schaefer, A., Ünal, S., Tresnan,  
531 D.B., Mather, S., Dormitzer, P.R., Şahin, U., Jansen, K.U., Gruber, W.C., 2020. Safety and Efficacy of  
532 the BNT162b2 mRNA Covid-19 Vaccine. *New England Journal of Medicine* 383, 2603-2615.
- 533 Prévost, J., Finzi, A., 2021. The great escape? SARS-CoV-2 variants evading neutralizing responses. *Cell*  
534 *Host Microbe* 29, 322-324.



- 535 Prévost, J., Gasser, R., Beaudoin-Bussi eres, G., Richard, J., Duerr, R., Laumaea, A., Anand, S.P.,  
536 Goyette, G., Benlarbi, M., Ding, S., Medjahed, H., Lewin, A., Perreault, J., Tremblay, T., Gendron-  
537 Lepage, G., Gauthier, N., Carrier, M., Marcoux, D., Pich e, A., Lavoie, M., Benoit, A., Loungnarath, V.,  
538 Brochu, G., Haddad, E., Stacey, H.D., Miller, M.S., Desforges, M., Talbot, P.J., Maule, G.T.G., C ot e, M.,  
539 Therrien, C., Serhir, B., Bazin, R., Roger, M., Finzi, A., 2020. Cross-Sectional Evaluation of Humoral  
540 Responses against SARS-CoV-2 Spike. *Cell Rep Med* 1, 100126.
- 541 Prévost, J., Richard, J., Gasser, R., Ding, S., Fage, C., Anand, S.P., Adam, D., Vergara, N.G., Tauzin, A.,  
542 Benlarbi, M., Gong, S.Y., Goyette, G., Priv e, A., Moreira, S., Charest, H., Roger, M., Mothes, W.,  
543 Pazgier, M., Brochiero, E., Boivin, G., Abrams, C.F., Sch on, A., Finzi, A., 2021. Impact of temperature  
544 on the affinity of SARS-CoV-2 Spike for ACE2. *bioRxiv*, 2021.2007.2009.451812.
- 545 Rambaut, A., Holmes, E.C., O’Toole,  .A., Hill, V., McCrone, J.T., Ruis, C., du Plessis, L., Pybus, O.G.,  
546 2020. A dynamic nomenclature proposal for SARS-CoV-2 lineages to assist genomic epidemiology.  
547 *Nature Microbiology* 5, 1403-1407.
- 548 Sadoff, J., Gray, G., Vandebosch, A., C ardenas, V., Shukarev, G., Grinsztejn, B., Goepfert, P.A., Truyers,  
549 C., Fennema, H., Spiessens, B., Offergeld, K., Scheper, G., Taylor, K.L., Robb, M.L., Treanor, J.,  
550 Barouch, D.H., Stoddard, J., Ryser, M.F., Marovich, M.A., Neuzil, K.M., Corey, L., Cauwenberghs, N.,  
551 Tanner, T., Hardt, K., Ruiz-Gui naz u, J., Le Gars, M., Schuitemaker, H., Van Hoof, J., Struyf, F.,  
552 Douoguih, M., 2021a. Safety and Efficacy of Single-Dose Ad26.COV2.S Vaccine against Covid-19. *New*  
553 *England Journal of Medicine* 384, 2187-2201.
- 554 Sadoff, J., Le Gars, M., Shukarev, G., Heerwegh, D., Truyers, C., de Groot, A.M., Stoop, J., Tete, S., Van  
555 Damme, W., Leroux-Roels, I., Berghmans, P.-J., Kimmel, M., Van Damme, P., de Hoon, J., Smith, W.,  
556 Stephenson, K.E., De Rosa, S.C., Cohen, K.W., McElrath, M.J., Cormier, E., Scheper, G., Barouch, D.H.,  
557 Hendriks, J., Struyf, F., Douoguih, M., Van Hoof, J., Schuitemaker, H., 2021b. Interim Results of a Phase  
558 1–2a Trial of Ad26.COV2.S Covid-19 Vaccine. *New England Journal of Medicine*.
- 559 Shang, J., Ye, G., Shi, K., Wan, Y., Luo, C., Aihara, H., Geng, Q., Auerbach, A., Li, F., 2020. Structural  
560 basis of receptor recognition by SARS-CoV-2. *Nature* 581, 221-224.
- 561 Starr, T.N., Greaney, A.J., Hilton, S.K., Ellis, D., Crawford, K.H.D., Dingens, A.S., Navarro, M.J.,  
562 Bowen, J.E., Tortorici, M.A., Walls, A.C., King, N.P., Veelsler, D., Bloom, J.D., 2020. Deep Mutational  
563 Scanning of SARS-CoV-2 Receptor Binding Domain Reveals Constraints on Folding and ACE2 Binding.  
564 *Cell* 182, 1295-1310.e1220.
- 565 Tauzin, A., Nayrac, M., Benlarbi, M., Gong, S.Y., Gasser, R., Beaudoin-Bussi eres, G., Brassard, N.,  
566 Laumaea, A., V ezina, D., Prévost, J., Anand, S.P., Bourassa, C., Gendron-Lepage, G., Medjahed, H.,  
567 Goyette, G., Niessl, J., Tastet, O., Gokool, L., Morrisseau, C., Arlotto, P., Stamatatos, L., McGuire, A.T.,  
568 Larochelle, C., Uchil, P., Lu, M., Mothes, W., De Serres, G., Moreira, S., Roger, M., Richard, J., Martel-  
569 Laf erri ere, V., Duerr, R., Tremblay, C., Kaufmann, D.E., Finzi, A., 2021. A single dose of the SARS-  
570 CoV-2 vaccine BNT162b2 elicits Fc-mediated antibody effector functions and T cell responses. *Cell Host*  
571 *Microbe* 29, 1137-1150.e1136.
- 572 Ullah, I., Prévost, J., Ladinsky, M.S., Stone, H., Lu, M., Anand, S.P., Beaudoin-Bussi eres, G., Benlarbi,  
573 M., Ding, S., Gasser, R., Fink, C., Chen, Y., Tauzin, A., Goyette, G., Bourassa, C., Medjahed, H., Mack,

574 M., Chung, K., Wilen, C.B., Dekaban, G.A., Dikeakos, J.D., Bruce, E.A., Kaufmann, D.E., Stamatatos,  
575 L., McGuire, A.T., Richard, J., Pazgier, M., Bjorkman, P.J., Mothes, W., Finzi, A., Kumar, P., Uchil,  
576 P.D., 2021. Live imaging of SARS-CoV-2 infection in mice reveals neutralizing antibodies require Fc  
577 function for optimal efficacy. bioRxiv.

578 Voysey, M., Clemens, S.A.C., Madhi, S.A., Weckx, L.Y., Folegatti, P.M., Aley, P.K., Angus, B., Baillie,  
579 V.L., Barnabas, S.L., Bhorat, Q.E., Bibi, S., Briner, C., Cicconi, P., Collins, A.M., Colin-Jones, R.,  
580 Cutland, C.L., Darton, T.C., Dheda, K., Duncan, C.J.A., Emary, K.R.W., Ewer, K.J., Fairlie, L., Faust,  
581 S.N., Feng, S., Ferreira, D.M., Finn, A., Goodman, A.L., Green, C.M., Green, C.A., Heath, P.T., Hill, C.,  
582 Hill, H., Hirsch, I., Hodgson, S.H.C., Izu, A., Jackson, S., Jenkin, D., Joe, C.C.D., Kerridge, S., Koen, A.,  
583 Kwatra, G., Lazarus, R., Lawrie, A.M., Lelliott, A., Libri, V., Lillie, P.J., Mallory, R., Mendes, A.V.A.,  
584 Milan, E.P., Minassian, A.M., McGregor, A., Morrison, H., Mujadidi, Y.F., Nana, A., O'Reilly, P.J.,  
585 Padayachee, S.D., Pittella, A., Plested, E., Pollock, K.M., Ramasamy, M.N., Rhead, S., Schwarzbold,  
586 A.V., Singh, N., Smith, A., Song, R., Snape, M.D., Sprinz, E., Sutherland, R.K., Tarrant, R., Thomson,  
587 E.C., Török, M.E., Toshner, M., Turner, D.P.J., Vekemans, J., Villafana, T.L., Watson, M.E.E., Williams,  
588 C.J., Douglas, A.D., Hill, A.V.S., Lambe, T., Gilbert, S.C., Pollard, A.J., Aban, M., Abayomi, F.,  
589 Abeyskera, K., Aboagye, J., Adam, M., Adams, K., Adamson, J., Adelaja, Y.A., Adewetan, G., Adlou, S.,  
590 Ahmed, K., Akhalwaya, Y., Akhalwaya, S., Alcock, A., Ali, A., Allen, E.R., Allen, L., Almeida,  
591 T.C.D.S.C., Alves, M.P.S., Amorim, F., Andritsou, F., Anslow, R., Appleby, M., Arbe-Barnes, E.H.,  
592 Ariaans, M.P., Arns, B., Arruda, L., Azi, P., Azi, L., Babbage, G., Bailey, C., Baker, K.F., Baker, M.,  
593 Baker, N., Baker, P., Baldwin, L., Baleanu, I., Bandeira, D., Bara, A., Barbosa, M.A.S., Barker, D.,  
594 Barlow, G.D., Barnes, E., Barr, A.S., Barrett, J.R., Barrett, J., Bates, L., Batten, A., Beadon, K., Beales,  
595 E., Beckley, R., Belij-Rammerstorfer, S., Bell, J., Bellamy, D., Bellei, N., Belton, S., Berg, A., Bermejo,  
596 L., Berrie, E., Berry, L., Berzenyi, D., Beveridge, A., Bewley, K.R., Bexhell, H., Bhikha, S., Bhorat,  
597 A.E., Bhorat, Z.E., Bijker, E., Birch, G., Birch, S., Bird, A., Bird, O., Bisnauthsing, K., Bittaye, M.,  
598 Blackstone, K., Blackwell, L., Bletchly, H., Blundell, C.L., Blundell, S.R., Bodialia, P., Boettger, B.C.,  
599 Bolam, E., Boland, E., Bormans, D., Borthwick, N., Bowring, F., Boyd, A., Bradley, P., Brenner, T.,  
600 Brown, P., Brown, C., Brown-O'Sullivan, C., Bruce, S., Brunt, E., Buchan, R., Budd, W., Bulbulia, Y.A.,  
601 Bull, M., Burbage, J., Burhan, H., Burn, A., Buttigieg, K.R., Byard, N., Cabera Puig, I., Calderon, G.,  
602 Calvert, A., Camara, S., Cao, M., Cappuccini, F., Cardoso, J.R., Carr, M., Carroll, M.W., Carson-Stevens,  
603 A., Carvalho, Y.d.M., Carvalho, J.A.M., Casey, H.R., Cashen, P., Castro, T., Castro, L.C., Cathie, K.,  
604 Cavey, A., Cerbino-Neto, J., Chadwick, J., Chapman, D., Charlton, S., Chelysheva, I., Chester, O., Chita,  
605 S., Cho, J.-S., Cifuentes, L., Clark, E., Clark, M., Clarke, A., Clutterbuck, E.A., Collins, S.L.K., Conlon,  
606 C.P., Connarty, S., Coombes, N., Cooper, C., Cooper, R., Cornelissen, L., Corrah, T., Cosgrove, C., Cox,  
607 T., Crocker, W.E.M., Crosbie, S., Cullen, L., Cullen, D., Cunha, D.R.M.F., Cunningham, C., Cuthbertson,  
608 F.C., Da Guarda, S.N.F., da Silva, L.P., Damratowski, B.E., Danos, Z., Dantas, M.T.D.C., Darroch, P.,  
609 Dattoo, M.S., Datta, C., Davids, M., Davies, S.L., Davies, H., Davis, E., Davis, J., Davis, J., De Nobrega,  
610 M.M.D., De Oliveira Kalid, L.M., Dearlove, D., Demissie, T., Desai, A., Di Marco, S., Di Maso, C.,  
611 Dinelli, M.I.S., Dinesh, T., Docksey, C., Dold, C., Dong, T., Donnellan, F.R., Dos Santos, T., dos Santos,  
612 T.G., Dos Santos, E.P., Douglas, N., Downing, C., Drake, J., Drake-Brockman, R., Driver, K., Drury, R.,  
613 Dunachie, S.J., Durham, B.S., Dutra, L., Easom, N.J.W., van Eck, S., Edwards, M., Edwards, N.J., El  
614 Muhanna, O.M., Elias, S.C., Elmore, M., English, M., Esmail, A., Essack, Y.M., Farmer, E., Farooq, M.,  
615 Farrar, M., Farrugia, L., Faulkner, B., Fedosyuk, S., Felle, S., Feng, S., Ferreira Da Silva, C., Field, S.,  
616 Fisher, R., Flaxman, A., Fletcher, J., Fofie, H., Fok, H., Ford, K.J., Fowler, J., Fraiman, P.H.A., Francis,  
617 E., Franco, M.M., Frater, J., Freire, M.S.M., Fry, S.H., Fudge, S., Furze, J., Fuskova, M., Galian-Rubio,  
618 P., Galiza, E., Garland, H., Gavrila, M., Geddes, A., Gibbons, K.A., Gilbride, C., Gill, H., Glynn, S.,  
619 Godwin, K., Gokani, K., Goldoni, U.C., Goncalves, M., Gonzalez, I.G.S., Goodwin, J., Goondiwala, A.,  
620 Gordon-Quayle, K., Gorini, G., Grab, J., Gracie, L., Greenland, M., Greenwood, N., Greffrath, J.,  
621 Groenewald, M.M., Grossi, L., Gupta, G., Hackett, M., Hallis, B., Hamaluba, M., Hamilton, E., Hamlyn,  
622 J., Hammersley, D., Hanrath, A.T., Hanumunthadu, B., Harris, S.A., Harris, C., Harris, T., Harrison, T.D.,



623 Harrison, D., Hart, T.C., Hartnell, B., Hassan, S., Haughney, J., Hawkins, S., Hay, J., Head, I., Henry, J.,  
624 Hermosin Herrera, M., Hettle, D.B., Hill, J., Hodges, G., Horne, E., Hou, M.M., Houlihan, C., Howe, E.,  
625 Howell, N., Humphreys, J., Humphries, H.E., Hurley, K., Huson, C., Hyder-Wright, A., Hyams, C.,  
626 Ikram, S., Ishwarbhai, A., Ivan, M., Iveson, P., Iyer, V., Jackson, F., De Jager, J., Jaumdally, S., Jeffers,  
627 H., Jesudason, N., Jones, B., Jones, K., Jones, E., Jones, C., Jorge, M.R., Jose, A., Joshi, A., Júnior,  
628 E.A.M.S., Kadziola, J., Kailath, R., Kana, F., Karampatsas, K., Kasanyinga, M., Keen, J., Kelly, E.J.,  
629 Kelly, D.M., Kelly, D., Kelly, S., Kerr, D., Kfourri, R.d.Á., Khan, L., Khozoe, B., Kidd, S., Killen, A.,  
630 Kinch, J., Kinch, P., King, L.D.W., King, T.B., Kingham, L., Klenerman, P., Knapper, F., Knight, J.C.,  
631 Knott, D., Koleva, S., Lang, M., Lang, G., Larkworthy, C.W., Larwood, J.P.J., Law, R., Lazarus, E.M.,  
632 Leach, A., Lees, E.A., Lemm, N.-M., Lessa, A., Leung, S., Li, Y., Lias, A.M., Liatsikos, K., Linder, A.,  
633 Lipworth, S., Liu, S., Liu, X., Lloyd, A., Lloyd, S., Loew, L., Lopez Ramon, R., Lora, L., Lowthorpe, V.,  
634 Luz, K., MacDonald, J.C., MacGregor, G., Madhavan, M., Mainwaring, D.O., Makambwa, E., Makinson,  
635 R., Malahleha, M., Malamatscho, R., Mallett, G., Mansatta, K., Maoko, T., Mapetla, K., Marchevsky,  
636 N.G., Marinou, S., Marlow, E., Marques, G.N., Marriott, P., Marshall, R.P., Marshall, J.L., Martins, F.J.,  
637 Masenya, M., Masilela, M., Masters, S.K., Mathew, M., Matlebjane, H., Matshidiso, K., Mazur, O.,  
638 Mazzella, A., McCaughan, H., McEwan, J., McGlashan, J., McInroy, L., McIntyre, Z., McLenaghan, D.,  
639 McRobert, N., McSwiggan, S., Megson, C., Mehdipour, S., Meijs, W., Mendonça, R.N.Á., Mentzer, A.J.,  
640 Mirtorabi, N., Mitton, C., Mnyakeni, S., Moghaddas, F., Molapo, K., Moloji, M., Moore, M., Moraes-  
641 Pinto, M.I., Moran, M., Morey, E., Morgans, R., Morris, S., Morris, S., Morris, H.C., Morselli, F.,  
642 Morshead, G., Morter, R., Mottal, L., Moultrie, A., Moya, N., Mpelebue, M., Msomi, S., Mugodi, Y.,  
643 Mukhopadhyay, E., Muller, J., Munro, A., Munro, C., Murphy, S., Mweu, P., Myasaki, C.H., Naik, G.,  
644 Naker, K., Nastouli, E., Nazir, A., Ndlovu, B., Neffa, F., Njenga, C., Noal, H., Noé, A., Novaes, G.,  
645 Nugent, F.L., Nunes, G., O'Brien, K., O'Connor, D., Odam, M., Oelofse, S., Oguti, B., Olchawski, V.,  
646 Oldfield, N.J., Oliveira, M.G., Oliveira, C., Oosthuizen, A., O'Reilly, P., Osborne, P., Owen, D.R.J.,  
647 Owen, L., Owens, D., Owino, N., Pacurar, M., Paiva, B.V.B., Palhares, E.M.F., Palmer, S., Parkinson, S.,  
648 Parracho, H.M.R.T., Parsons, K., Patel, D., Patel, B., Patel, F., Patel, K., Patrick-Smith, M., Payne, R.O.,  
649 Peng, Y., Penn, E.J., Pennington, A., Peralta Alvarez, M.P., Perring, J., Perry, N., Perumal, R., Petkar, S.,  
650 Philip, T., Phillips, D.J., Phillips, J., Phohu, M.K., Pickup, L., Pieterse, S., Piper, J., Pipini, D., Plank, M.,  
651 Du Plessis, J., Pollard, S., Pooley, J., Pooran, A., Poulton, I., Powers, C., Presa, F.B., Price, D.A., Price,  
652 V., Primeira, M., Proud, P.C., Provstgaard-Morys, S., Pueschel, S., Pulido, D., Quaid, S., Rabara, R.,  
653 Radford, A., Radia, K., Rajapaska, D., Rajeswaran, T., Ramos, A.S.F., Ramos Lopez, F., Rampling, T.,  
654 Rand, J., Ratcliffe, H., Rawlinson, T., Rea, D., Rees, B., Reiné, J., Resuello-Dauti, M., Reyes Pabon, E.,  
655 Ribiero, C.M., Ricamara, M., Richter, A., Ritchie, N., Ritchie, A.J., Robbins, A.J., Roberts, H., Robinson,  
656 R.E., Robinson, H., Rocchetti, T.T., Rocha, B.P., Roche, S., Rollier, C., Rose, L., Ross Russell, A.L.,  
657 Rossouw, L., Royal, S., Rudiansyah, I., Ruiz, S., Saich, S., Sala, C., Sale, J., Salman, A.M., Salvador, N.,  
658 Salvador, S., Sampaio, M., Samson, A.D., Sanchez-Gonzalez, A., Sanders, H., Sanders, K., Santos, E.,  
659 Santos Guerra, M.F.S., Satti, I., Saunders, J.E., Saunders, C., Sayed, A., Schim van der Loeff, I., Schmid,  
660 A.B., Schofield, E., Screatton, G., Seddiqi, S., Segireddy, R.R., Senger, R., Serrano, S., Shah, R., Shaik, I.,  
661 Sharpe, H.E., Sharrocks, K., Shaw, R., Shea, A., Shepherd, A., Shepherd, J.G., Shiham, F., Sidhom, E.,  
662 Silk, S.E., da Silva Moraes, A.C., Silva-Junior, G., Silva-Reyes, L., Silveira, A.D., Silveira, M.B.V.,  
663 Sinha, J., Skelly, D.T., Smith, D.C., Smith, N., Smith, H.E., Smith, D.J., Smith, C.C., Soares, A., Soares,  
664 T., Solórzano, C., Sorio, G.L., Sorley, K., Sosa-Rodriguez, T., Souza, C.M.C.D.L., Souza, B.S.D.F.,  
665 Souza, A.R., Spencer, A.J., Spina, F., Spoons, L., Stafford, L., Stamford, I., Starinskij, I., Stein, R.,  
666 Steven, J., Stockdale, L., Stockwell, L.V., Strickland, L.H., Stuart, A.C., Sturdy, A., Sutton, N., Szigeti,  
667 A., Tahiri-Alaoui, A., Tanner, R., Taoushanis, C., Tarr, A.W., Taylor, K., Taylor, U., Taylor, I.J., Taylor,  
668 J., te Water Naude, R., Themistocleous, Y., Themistocleous, A., Thomas, M., Thomas, K., Thomas, T.M.,  
669 Thombrayil, A., Thompson, F., Thompson, A., Thompson, K., Thompson, A., Thomson, J., Thornton-  
670 Jones, V., Tighe, P.J., Tinoco, L.A., Tiongson, G., Tladinyane, B., Tomasicchio, M., Tomic, A., Tonks,  
671 S., Towner, J., Tran, N., Tree, J., Trillana, G., Trinham, C., Trivett, R., Truby, A., Tsheko, B.L., Turabi,  
672 A., Turner, R., Turner, C., Ulaszewska, M., Underwood, B.R., Varughese, R., Verbart, D., Verheul, M.,  
673 Vichos, I., Vieira, T., Waddington, C.S., Walker, L., Wallis, E., Wand, M., Warbick, D., Wardell, T.,

- 674 Warimwe, G., Warren, S.C., Watkins, B., Watson, E., Webb, S., Webb-Bridges, A., Webster, A., Welch,  
675 J., Wells, J., West, A., White, C., White, R., Williams, P., Williams, R.L., Winslow, R., Woodyer, M.,  
676 Worth, A.T., Wright, D., Wroblewska, M., Yao, A., Zimmer, R., Zizi, D., Zuidewind, P., 2021. Safety  
677 and efficacy of the ChAdOx1 nCoV-19 vaccine (AZD1222) against SARS-CoV-2: an interim analysis of  
678 four randomised controlled trials in Brazil, South Africa, and the UK. *The Lancet* 397, 99-111.
- 679 Walls, A.C., Park, Y.J., Tortorici, M.A., Wall, A., McGuire, A.T., Velesler, D., 2020. Structure, Function,  
680 and Antigenicity of the SARS-CoV-2 Spike Glycoprotein. *Cell* 181, 281-292.e286.
- 681 Walls, A.C., Xiong, X., Park, Y.J., Tortorici, M.A., Snijder, J., Quispe, J., Cameroni, E., Gopal, R., Dai,  
682 M., Lanzavecchia, A., Zambon, M., Rey, F.A., Corti, D., Velesler, D., 2019. Unexpected Receptor  
683 Functional Mimicry Elucidates Activation of Coronavirus Fusion. *Cell* 176, 1026-1039.e1015.
- 684 Wang, P., Nair, M.S., Liu, L., Iketani, S., Luo, Y., Guo, Y., Wang, M., Yu, J., Zhang, B., Kwong, P.D.,  
685 Graham, B.S., Mascola, J.R., Chang, J.Y., Yin, M.T., Sobieszczyk, M., Kyratsous, C.A., Shapiro, L.,  
686 Sheng, Z., Huang, Y., Ho, D.D., 2021. Antibody resistance of SARS-CoV-2 variants B.1.351 and B.1.1.7.  
687 *Nature* 593, 130-135.
- 688 Washington, N.L., Gangavarapu, K., Zeller, M., Bolze, A., Cirulli, E.T., Schiabor Barrett, K.M., Larsen,  
689 B.B., Anderson, C., White, S., Cassens, T., Jacobs, S., Levan, G., Nguyen, J., Ramirez, J.M., III, Rivera-  
690 Garcia, C., Sandoval, E., Wang, X., Wong, D., Spencer, E., Robles-Sikisaka, R., Kurzban, E., Hughes,  
691 L.D., Deng, X., Wang, C., Servellita, V., Valentine, H., De Hoff, P., Seaver, P., Sathe, S., Gietzen, K.,  
692 Sickler, B., Antico, J., Hoon, K., Liu, J., Harding, A., Bakhtar, O., Basler, T., Austin, B., MacCannell, D.,  
693 Isaksson, M., Febbo, P.G., Becker, D., Laurent, M., McDonald, E., Yeo, G.W., Knight, R., Laurent, L.C.,  
694 de Feo, E., Worobey, M., Chiu, C.Y., Suchard, M.A., Lu, J.T., Lee, W., Andersen, K.G., 2021.  
695 Emergence and rapid transmission of SARS-CoV-2 B.1.1.7 in the United States. *Cell* 184, 2587-  
696 2594.e2587.
- 697 West, A.P., Wertheim, J.O., Wang, J.C., Vasylyeva, T.I., Havens, J.L., Chowdhury, M.A., Gonzalez, E.,  
698 Fang, C.E., Di Lonardo, S.S., Hughes, S., Rakeman, J.L., Lee, H.H., Barnes, C.O., Gnanapragasam,  
699 P.N.P., Yang, Z., Gaebler, C., Caskey, M., Nussenzweig, M.C., Keeffe, J.R., Bjorkman, P.J., 2021.  
700 Detection and characterization of the SARS-CoV-2 lineage B.1.526 in New York. *bioRxiv*,  
701 2021.2002.2014.431043.
- 702 Wrapp, D., Wang, N., Corbett, K.S., Goldsmith, J.A., Hsieh, C.L., Abiona, O., Graham, B.S., McLellan,  
703 J.S., 2020. Cryo-EM structure of the 2019-nCoV spike in the prefusion conformation. *Science* 367, 1260-  
704 1263.
- 705 Zhu, X., Mannar, D., Srivastava, S.S., Berezuk, A.M., Demers, J.P., Saville, J.W., Leopold, K., Li, W.,  
706 Dimitrov, D.S., Tuttle, K.S., Zhou, S., Chittori, S., Subramaniam, S., 2021. Cryo-electron microscopy  
707 structures of the N501Y SARS-CoV-2 spike protein in complex with ACE2 and 2 potent neutralizing  
708 antibodies. *PLoS Biol* 19, e3001237.

709

710

711 **Figure legends**

712

713

714 **Figure 1. Evaluation hACE2 Fc binding to SARS-CoV-2 Spike variants**

715 HEK 293T cells were transfected to express the indicated SARS-CoV-2 Spike variants. Two days  
716 post transfection, cells were stained with ACE2-Fc or with CV3-25 Ab as Spike expression control  
717 and analyzed by flow cytometry. ACE2-Fc binding to (A) full Spikes variants or the (B) B.1.1.7,  
718 (C) B.1.351, (D) P.1, (E) B.1.429, and (F) B.1.526 Spike and its corresponding single mutations  
719 are presented as a ratio of ACE2 binding to D614G Spike normalized to CV3-25 binding. Error  
720 bars indicate means  $\pm$  SEM. Statistical significance has been performed using Mann-Whitney U  
721 test according to normality analysis (\* $p < 0.05$ ; \*\* $p < 0.01$ ; \*\*\* $p < 0.001$ ; \*\*\*\* $p < 0.0001$ ).

722

723 **Figure 2. Kinetic Analysis of RBD interaction to hACE2 Binding by Biolayer Interferometry**

724 Association of the different RBD proteins to sACE2 was carried out for 180s at various  
725 concentrations in a two-fold dilution series from 500nM to 31.25nM prior to dissociation for 300s  
726 for (A) WT, (B) N501Y, (C) K417N, (D) K417T, (F) E484K, and (G)L452R. Curve fitting was  
727 performed using a 1:1 binding model in the ForteBio data analysis software. Calculation of on-  
728 rates ( $K_a$ ), off-rates ( $K_{dis}$ ), and affinity constants ( $K_D$ ) was computed using a global fit applied to  
729 all data. Raw data are presented in blue and fitting models are in red. Results are summarized in  
730 Table S1.

731

732 **Figure 3. Evaluation of the impact of temperature on Spike-ACE2 interaction.**

733 HEK 293T cells were transfected with the indicated SARS-CoV-2 Spike variants. Two days post  
734 transfection, cells were stained with ACE2-Fc or with CV3-25 Ab as Spike expression control at

735 4°C or 37°C and analyzed by flow cytometry. ACE2-Fc binding to the different Spike variants are  
736 presented as a ratio of ACE2 binding to D614G Spik, normalized to CV3-25 binding at 37°C (red)  
737 or at 4°C (blue). Statistical analyses were used to compare each Spike at 4°C vs 37°C (black) or to  
738 compare variants Spike to D614G at 37°C (red) or at 4°C (blue). Fold changes of ACE2 binding at  
739 4°C vs 37°C for each Spike is shown in black. Error bars indicate means  $\pm$  SEM. Statistical  
740 significance has been performed using Mann-Whitney U test (\*p < 0.05; \*\*p < 0.01; \*\*\*p < 0.001;  
741 \*\*\*\*p < 0.0001, ns; non-significant).

742

743 **Figure 4. Recognition of SARS-CoV-2 Spike variants and single mutants by plasma from**  
744 **vaccinated SARS-CoV-2 naïve individuals.**

745 HEK 293T cells were transfected with the indicated SARS-CoV-2 spike variants. Two days post  
746 transfection, cells were stained with 1:250 dilution of plasma collected from naive post vaccinated  
747 individuals (n=3-5) or with CV3-25 Ab as control and analyzed by flow cytometry. Plasma  
748 recognition of (A) full Spike variants (B) B.1.1.7, (C) B.1.351, (D) P.1, (E) B.1.429, (F) B.1.526  
749 Spike and variant-specific Spike single mutations are presented as ratio of plasma binding to  
750 D614G Spike normalized CV3-25 binding. Error bars indicate means $\pm$  SEM. Statistical  
751 significance has been performed using Mann-Whitney U test (\*p < 0.05; \*\*p < 0.01; \*\*\*p < 0.001;  
752 \*\*\*\*p < 0.0001).

753

754 **Figure 5. Recognition of SARS-CoV-2 Spike variants and single mutants by plasma from**  
755 **vaccinated previously-infected individuals.**

756 HEK293T cells were transfected with SARS-CoV-2 full Spike variants and stained with plasma  
757 collected 3 weeks post-first dose vaccinated previously infected individuals (n=3-5) or with CV3-

758 25 Ab and analyzed by flow cytometry. Plasma recognition of (A) full Spike variants or the (B)  
759 B.1.1.7, (C) B.1.351, (D) P.1, (E) B.1.429, (F) B.1.526 Spikes and Spikes with their corresponding  
760 single mutations are presented as a ratio of plasma binding to D614G Spike normalized with CV3-  
761 25 binding. Error bars indicate means  $\pm$  SEM. Statistical significance has been performed using  
762 Mann-Whitney U test (\* $p < 0.05$ ; \*\* $p < 0.01$ ; \*\*\* $p < 0.001$ ; \*\*\*\* $p < 0.0001$ ).

763

764 **Figure 6. Neutralization of SARS-CoV-2 Spike variants by plasma from previously infected**  
765 **vaccinated individuals**

766 Neutralizing activity of previously infected vaccinated individuals against pseudoviruses bearing  
767 the SARS-CoV-2 Spike variants were assessed. Pseudoviruses with serial dilutions of plasma were  
768 incubate for 1 h at 37°C before infecting 293T-ACE2 cells. ID<sub>50</sub> against pseudoviruses were  
769 calculated by a normalized non-linear regression using GraphPad Prism software. Detection limit  
770 is indicated in the graph (ID<sub>50</sub>=50). Statistical significance has been performed using Mann-  
771 Whitney U test (\* $p < 0.05$ ).

772

773 **SUPPLEMENTAL TABLE**

774 **Table S1. Binding Kinetics of the interaction between SARS-CoV-2 RBD and sACE2**  
775 **quantified by Biolayer Interferometry.**

776

777 **Table S2. Summary of ACE2 Binding, Plasma binding, and Neutralization to Spike variants.**

778

779 **SUPPLEMENTAL FIGURES**

780 **Figure S1. Recognition of SARS-CoV-2 Spike variants and single mutants by plasma from**  
781 **convalescent donors.**

782 HEK293T cells were transfected with the indicated SARS-CoV-2 spike variants and stained with  
783 plasma collected from individuals that were infected around 9 months before plasma collection  
784 (n=5) or with CV3-25Ab and analyzed by flow cytometry. Plasma recognition of (A) full Spike  
785 variants or the (B) B.1.1.7, (C) B.1.351, (D) P.1, (E) B.1.429, (F) B.1.526 Spikes and lineage  
786 specific Spike single mutations are presented as ratio of plasma binding to D614G normalized with  
787 CV3-25 binding. Error bars indicate means $\pm$  SEM. Statistical significance has been performed  
788 using Mann-Whitney U test (\*p < 0.05; \*\*p < 0.01; \*\*\*p < 0.001; \*\*\*\*p < 0.0001).

789

790 **Figure S2. Recognition of SARS-CoV-2 Spike variants by plasma from naïve or previously-**  
791 **infected, vaccinated individuals.**

792 HEK293T cells were transfected with SARS-CoV-2 full Spike variants and stained with plasma  
793 collected 3 weeks post-first dose vaccinated previously infected individuals (n=5), first dose  
794 vaccinated naïve individuals (n=5), or CV3-25 Ab and analyzed by flow cytometry. Plasma  
795 recognition of full Spike variants are represented as Median Fluorescent Intensities (MFIs)

796 normalized as a percentage of CV3-25 binding. Error bars indicate means  $\pm$  SEM. Statistical  
797 significance has been performed using Mann-Whitney U test (\* $p < 0.05$ ; \*\* $p < 0.01$ ; \*\*\* $p < 0.001$ ;  
798 \*\*\*\* $p < 0.0001$ ).

799

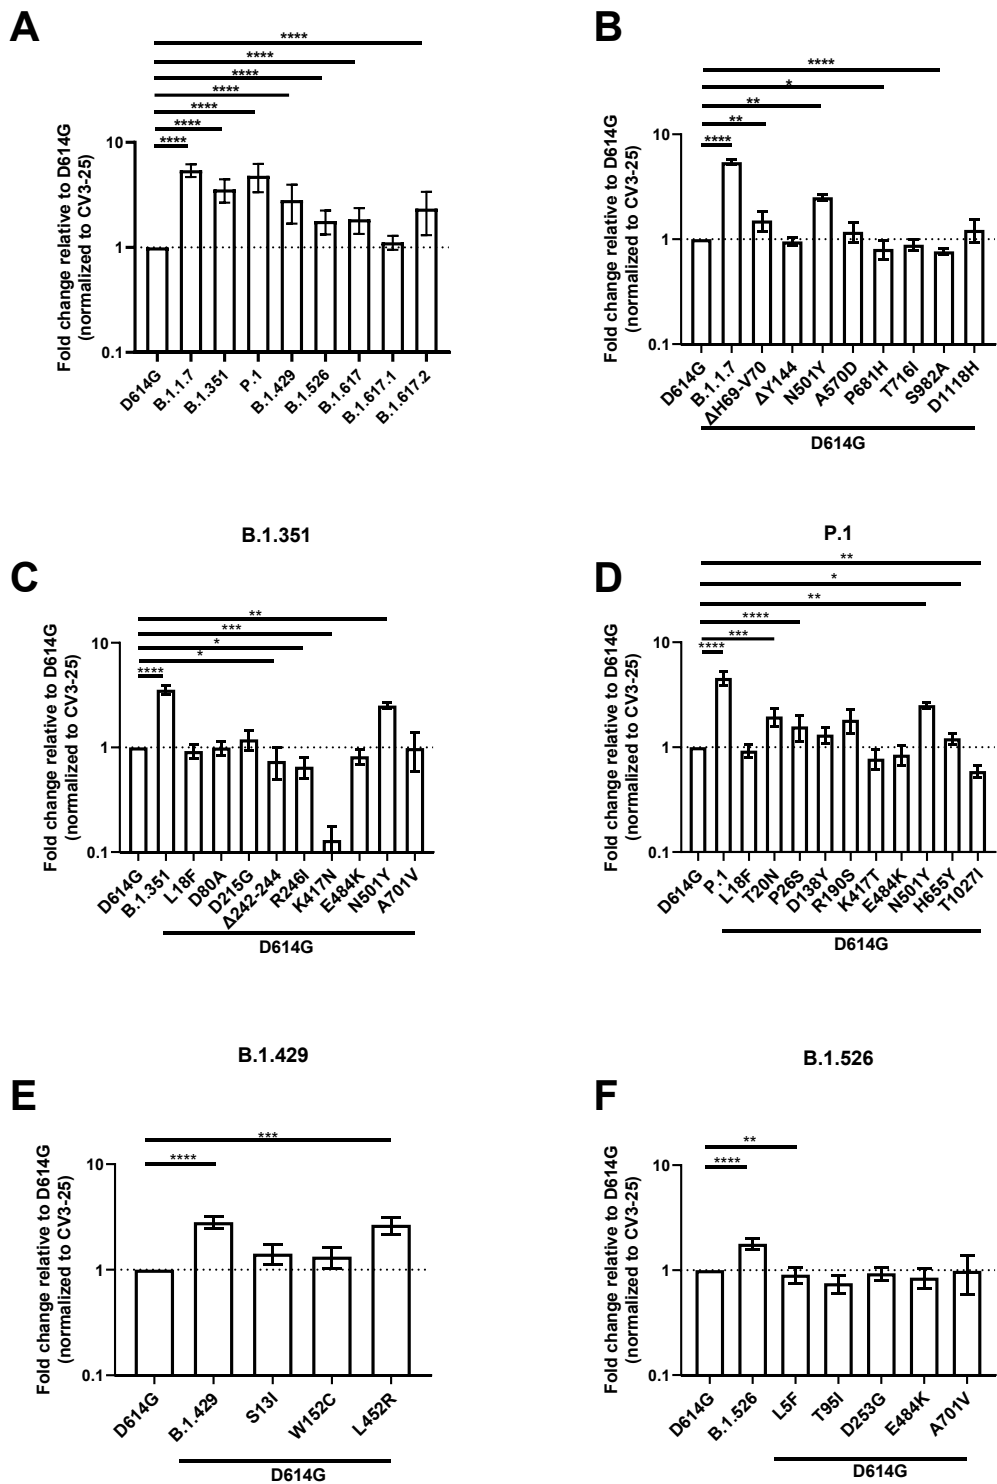

Figure 1



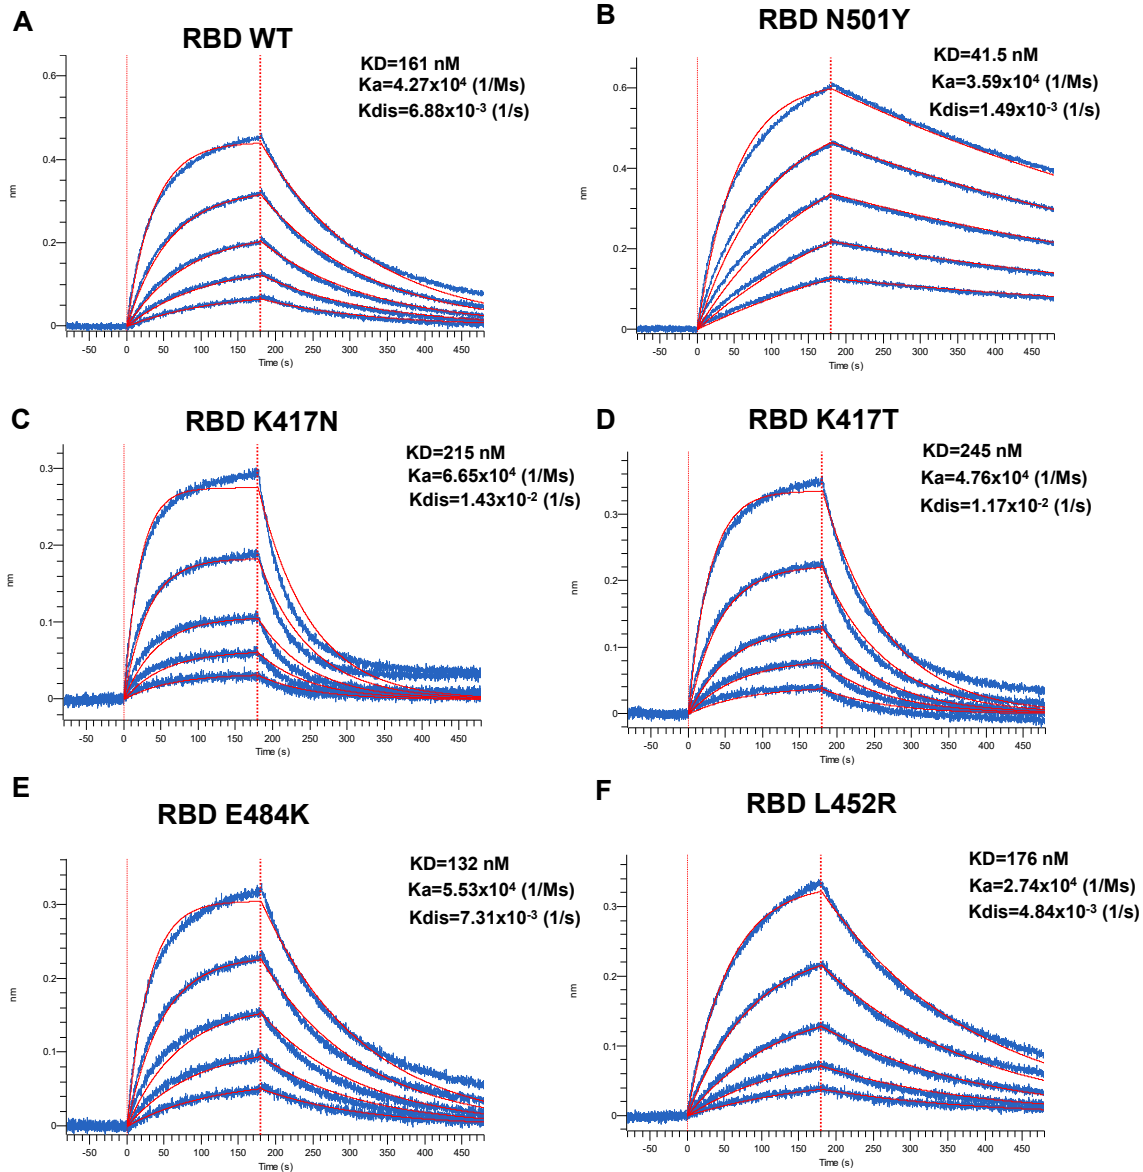

Figure 2

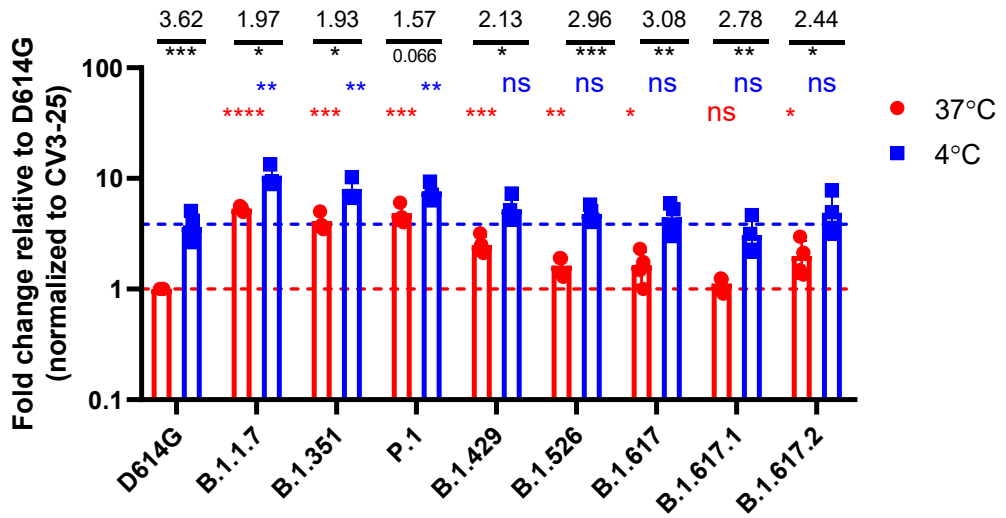

Figure 3

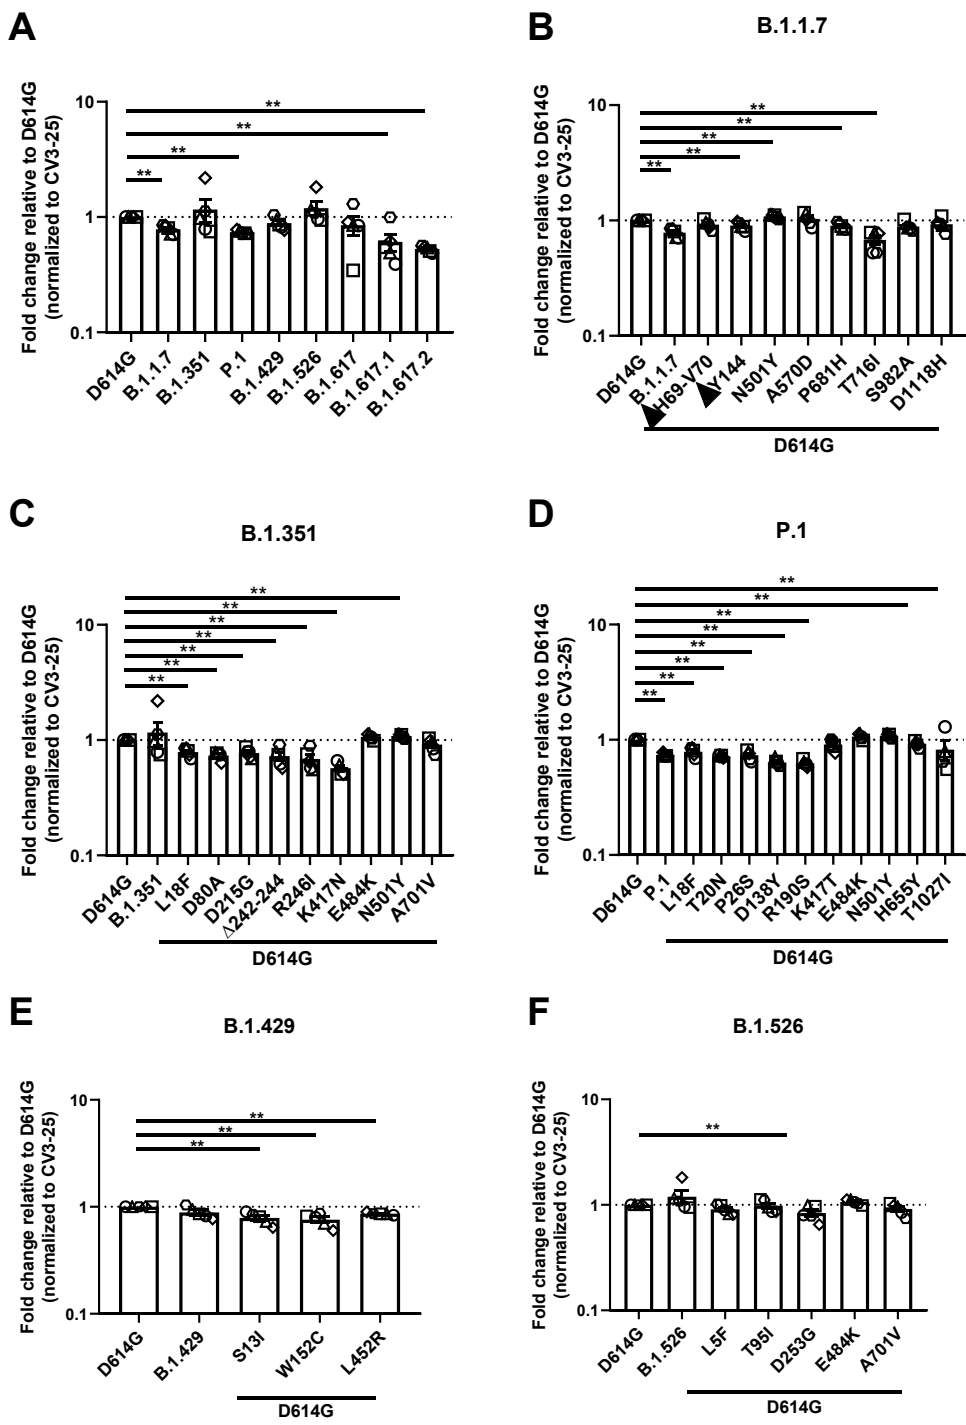

Figure 4

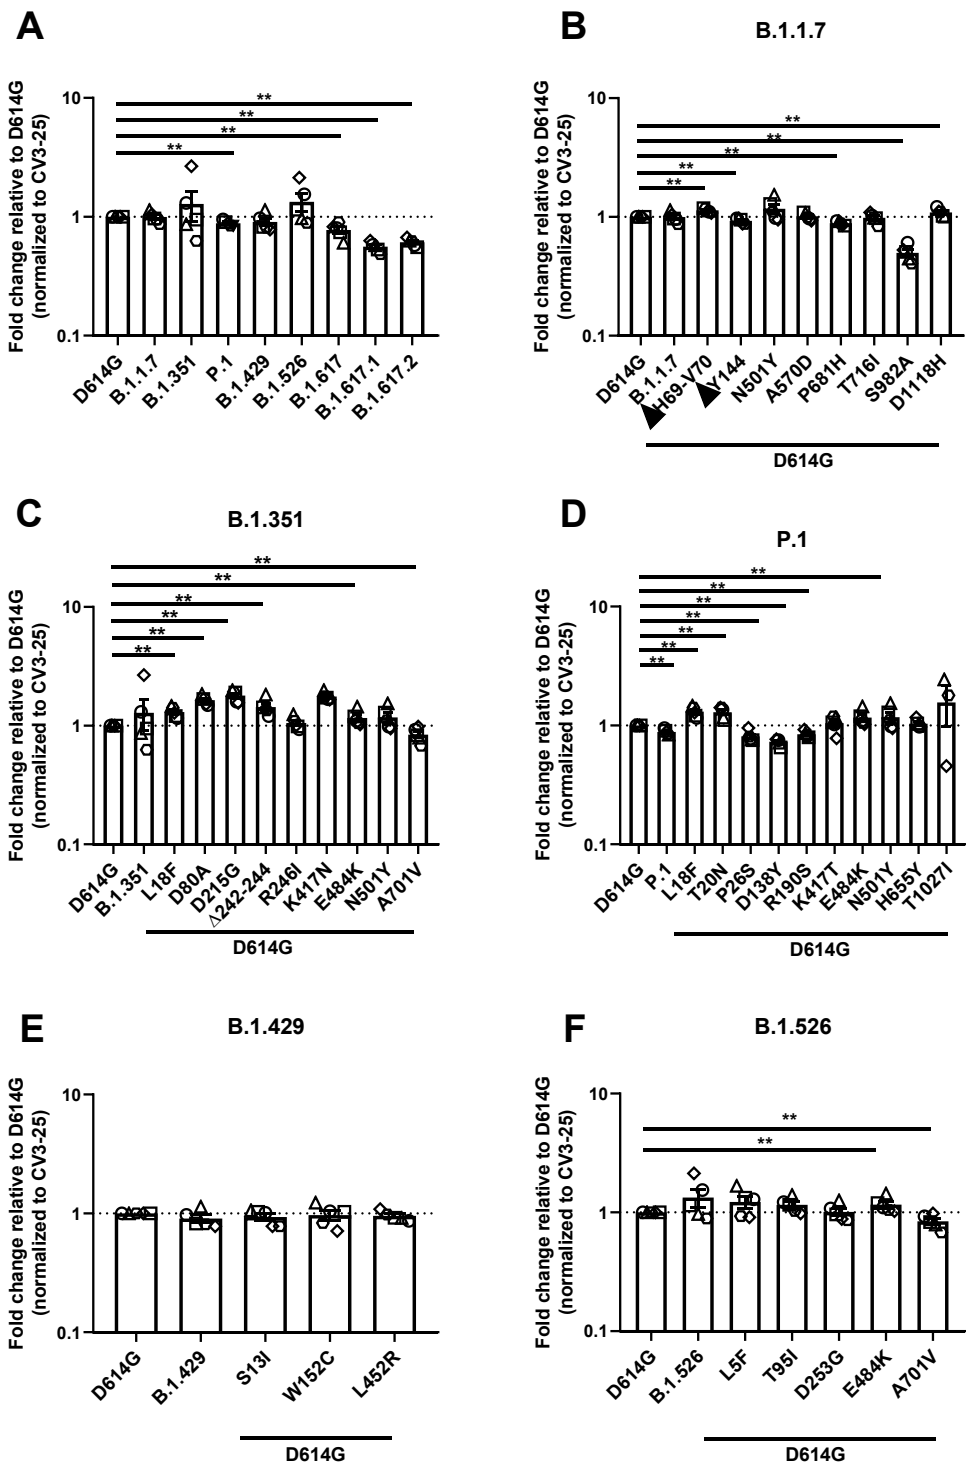

Figure 5

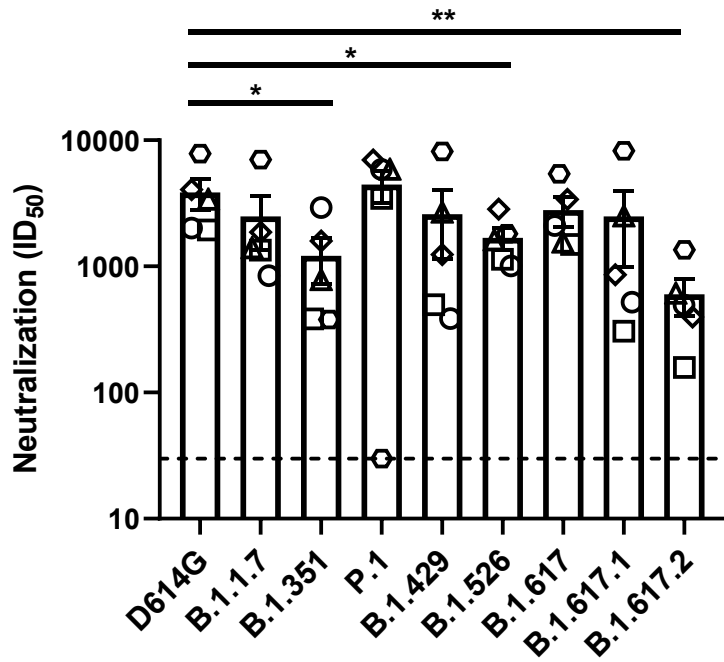

Figure 6

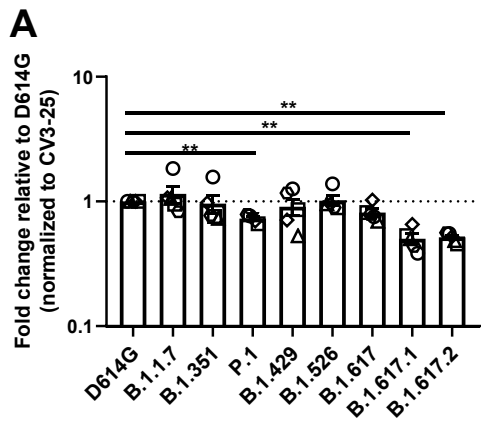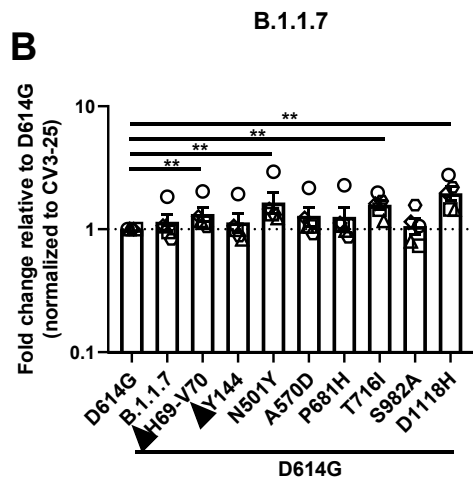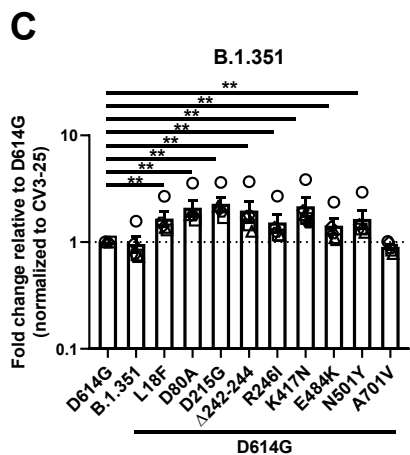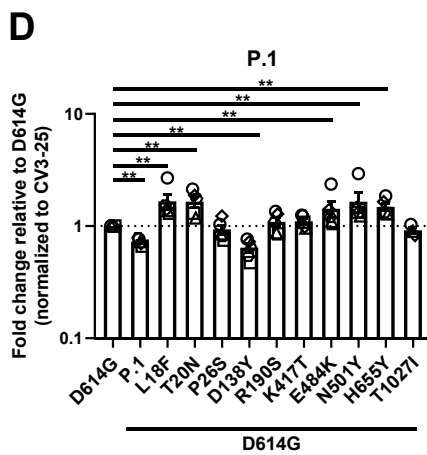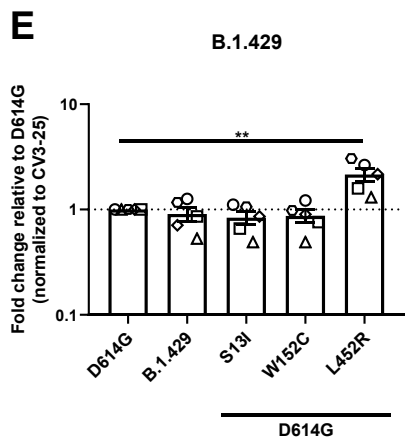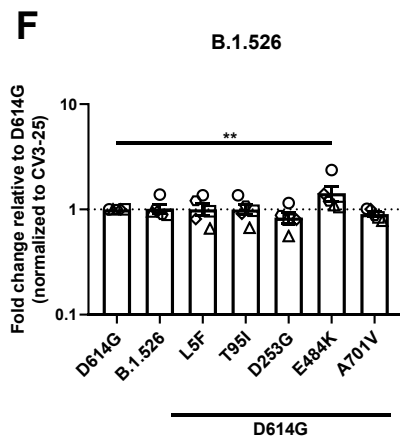

Figure S1

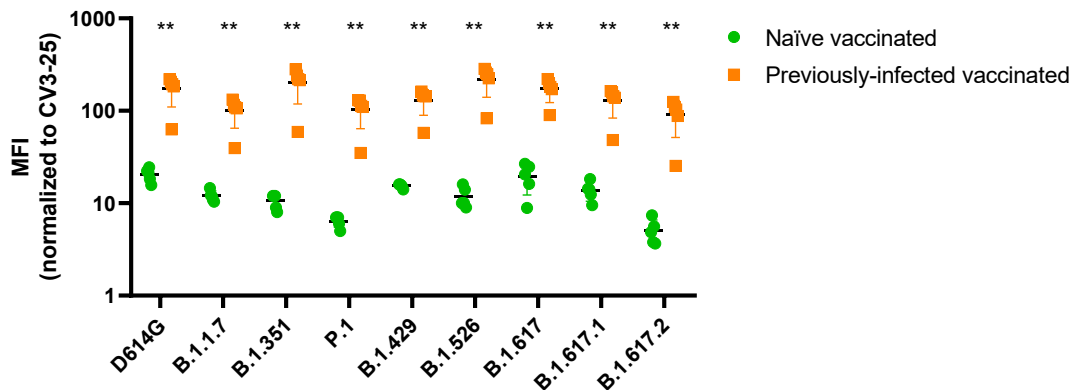

Figure S2

**Table S1:** Binding Kinetics of the interaction between SARS-CoV-2 RBD and sACE2 quantified by Biolayer Interferometry.

| RBD   | ACE2 binding<br>(RBD/biolayer interferometry) |             |                      |             |                       |             |
|-------|-----------------------------------------------|-------------|----------------------|-------------|-----------------------|-------------|
|       | KD (nM)                                       | Fold change | Ka (1/Ms)            | Fold change | Kdis (1/s)            | Fold change |
| WT    | 161                                           | 1           | 4.27x10 <sup>4</sup> | 1           | 6.88x10 <sup>-3</sup> | 1           |
| N501Y | 41.5                                          | 3.88        | 3.59x10 <sup>4</sup> | 0.84        | 1.49x10 <sup>-3</sup> | 0.22        |
| K417N | 215                                           | 0.75        | 6.65x10 <sup>4</sup> | 1.56        | 1.43x10 <sup>-2</sup> | 2.07        |
| K417T | 245                                           | 0.66        | 4.76x10 <sup>4</sup> | 1.11        | 1.17x10 <sup>-2</sup> | 1.70        |
| E484K | 132                                           | 1.22        | 5.53x10 <sup>4</sup> | 1.29        | 7.31x10 <sup>-3</sup> | 1.06        |
| L452R | 176                                           | 0.91        | 2.74x10 <sup>4</sup> | 0.64        | 4.84x10 <sup>-3</sup> | 0.70        |



**Table S2. Summary of ACE2 Binding, Plasma binding, and Neutralization to Spike variants.**

| Variant / mutant |                 | ACE2 binding <sup>a</sup> | Spike recognition by plasma <sup>b</sup> |                                                           |                                             | Neutralization <sup>c</sup><br>ID50 (ratio to D614G) |
|------------------|-----------------|---------------------------|------------------------------------------|-----------------------------------------------------------|---------------------------------------------|------------------------------------------------------|
|                  |                 |                           | Previously infected (8 months PSO)       | Previously infected Vaccinated (3 weeks post-vaccination) | Naïve vaccinated (3 weeks post-vaccination) |                                                      |
|                  | D614G           | 1.00                      | 1.00                                     | 1.00                                                      | 1.00                                        | 3852 (1)                                             |
| B.1.1.7          | Full variant    | 5.43                      | 1.15                                     | 1.00                                                      | 0.78                                        | 2492 (0.65)                                          |
|                  | D614G/Δ69-70    | 1.51                      | 1.33                                     | 1.14                                                      | 0.92                                        |                                                      |
|                  | D614G/Δ144      | 0.95                      | 1.14                                     | 0.93                                                      | 0.90                                        |                                                      |
|                  | D614G/N501Y     | 2.52                      | 1.65                                     | 1.17                                                      | 1.09                                        |                                                      |
|                  | D614G/A570D     | 1.18                      | 1.29                                     | 1.01                                                      | 1.04                                        |                                                      |
|                  | D614G/P681H     | 0.81                      | 1.26                                     | 0.88                                                      | 0.90                                        |                                                      |
|                  | D614G/T716I     | 0.89                      | 1.58                                     | 0.98                                                      | 0.68                                        |                                                      |
|                  | D614G/S982A     | 0.77                      | 1.06                                     | 0.50                                                      | 0.89                                        |                                                      |
|                  | D614G/D1118H    | 1.23                      | 1.96                                     | 1.09                                                      | 0.93                                        |                                                      |
| B.1.351          | Full variant    | 3.56                      | 0.96                                     | 1.28                                                      | 1.17                                        | 1211 (0.31)                                          |
|                  | D614G/L18F      | 0.93                      | 1.66                                     | 1.30                                                      | 0.79                                        |                                                      |
|                  | D614G/D80A      | 1.00                      | 2.11                                     | 1.64                                                      | 0.74                                        |                                                      |
|                  | D614G/D215G     | 1.19                      | 2.29                                     | 1.79                                                      | 0.77                                        |                                                      |
|                  | D614G/ Δ242-244 | 0.74                      | 1.97                                     | 1.43                                                      | 0.73                                        |                                                      |
|                  | D614G/R246I     | 0.66                      | 1.53                                     | 1.05                                                      | 0.69                                        |                                                      |
|                  | D614G/K417N     | 0.13                      | 2.16                                     | 1.76                                                      | 0.57                                        |                                                      |
|                  | D614G/E484K     | 0.82                      | 1.42                                     | 1.16                                                      | 1.06                                        |                                                      |
|                  | D614G/N501Y     | 2.52                      | 1.65                                     | 1.17                                                      | 1.09                                        |                                                      |
| D614G/A701V      | 0.99            | 0.90                      | 0.84                                     | 0.91                                                      |                                             |                                                      |
| P.1              | Full variant    | 4.24                      | 0.77                                     | 0.88                                                      | 0.79                                        | 4445 (1.15)                                          |
|                  | D614G/L18F      | 0.93                      | 1.66                                     | 1.30                                                      | 0.79                                        |                                                      |
|                  | D614G/T20N      | 1.96                      | 1.65                                     | 1.29                                                      | 0.72                                        |                                                      |
|                  | D614G/P26S      | 1.58                      | 0.93                                     | 0.81                                                      | 0.73                                        |                                                      |
|                  | D614G/D138Y     | 1.32                      | 0.64                                     | 0.73                                                      | 0.64                                        |                                                      |
|                  | D614G/R190S     | 1.82                      | 1.09                                     | 0.84                                                      | 0.63                                        |                                                      |
|                  | D614G/K417T     | 0.78                      | 1.10                                     | 1.04                                                      | 0.91                                        |                                                      |
|                  | D614G/E484K     | 0.85                      | 1.42                                     | 1.16                                                      | 1.06                                        |                                                      |
|                  | D614G/N501Y     | 2.52                      | 1.65                                     | 1.17                                                      | 1.09                                        |                                                      |
| D614G/H655Y      | 1.21            | 1.48                      | 1.04                                     | 0.92                                                      |                                             |                                                      |
| D614G/T1027I     | 0.59            | 1.56                      | 0.76                                     | 0.82                                                      |                                             |                                                      |
| B.1.526          | Full variant    | 1.78                      | 1.02                                     | 1.34                                                      | 1.19                                        | 1686 (0.44)                                          |
|                  | D614G/L5F       | 0.91                      | 1.00                                     | 1.23                                                      | 0.91                                        |                                                      |
|                  | D614G/T95I      | 0.75                      | 1.00                                     | 1.16                                                      | 0.98                                        |                                                      |
|                  | D614G/D253G     | 0.93                      | 0.84                                     | 1.01                                                      | 0.84                                        |                                                      |
|                  | D614G/E484K     | 0.85                      | 1.42                                     | 1.16                                                      | 1.06                                        |                                                      |
|                  | D614G/A701V     | 0.99                      | 0.90                                     | 0.84                                                      | 0.91                                        |                                                      |
| B.1.429          | Full variant    | 2.82                      | 0.91                                     | 0.90                                                      | 0.89                                        | 2591 (0.67)                                          |
|                  | D614G/S13I      | 1.42                      | 0.84                                     | 0.93                                                      | 0.79                                        |                                                      |
|                  | D614G/W152C     | 1.33                      | 0.87                                     | 0.97                                                      | 0.76                                        |                                                      |
|                  | D614G/L452R     | 2.66                      | 2.15                                     | 0.95                                                      | 0.86                                        |                                                      |
| B.1.617          | Full variant    | 1.85                      | 0.82                                     | 0.77                                                      | 0.85                                        | 2795 (0.73)                                          |
| B.1.617.1        | Full variant    | 1.12                      | 0.50                                     | 0.56                                                      | 0.61                                        | 2489 (0.65)                                          |
| B.1.617.2        | Full variant    | 2.34                      | 0.52                                     | 0.61                                                      | 0.53                                        | 601 (0.16)                                           |

- a) ACE2-Fc binding was normalized to CV3-25 binding in each experiment. Values are presented as ratio of normalized ACE2-Fc binding obtain with the D614G Spike. Values represent the means of data obtained from at least three independent experiments.
- b) Plasma binding were normalized to CV3-25 in each experiment. Values are presented as ratio of normalized plasma binding obtained with the D614G Spike. Values represent the means of data obtained with 3-5 plasma from the same group.
- c) The ID50 represents the plasma dilution to inhibit 50% of the infection of 293T-ACE2 cells by recombinant viruses bearing the indicated Spike. Values are presented as the means of ID50 and as ratio of the ID50 obtained with virus bearing the D614G Spike. Values represent the means of data obtained with 3-5 different plasma.
